# Supplementary material
Source: PubMed Central journal article supplement (PMC5024639)
Supplement: pnas.1607794113.sapp.pdf [file pnas.1607794113.sapp.pdf]

# Supporting Information Appendix

Hoang et al., PNAS 2016

## SI Materials and Methods

**Dilution of Y-adapter-ligated molecules.** TruSeq adapter-ligated molecules were in a total volume of 20  $\mu$ L. Five ten-fold serial dilutions were performed in 96-well PCR plates starting with 2  $\mu$ L of adapter-ligated molecules (prior to PCR) in 18  $\mu$ L of dilution buffer (TE containing 1 ng/ $\mu$ L pBlueScript). Samples were mixed by gently pipetting with a multichannel pipette. Two  $\mu$ L of each sample was then transferred into 18  $\mu$ L of fresh dilution buffer using a multichannel pipette. The mixing and transferring was repeated for a total of five serial dilutions. Only 2  $\mu$ L of each dilution (1/10 total volume) was used as template for each PCR. A  $10^3$ -fold dilution was accomplished as follows: (i) use of 2  $\mu$ L of the total 20  $\mu$ L of adapter-ligated molecules (10-fold dilution); (ii) mixing 2  $\mu$ L of adapter-ligated molecules with dilution buffer in a total volume of 20  $\mu$ L (10-fold dilution); and (iii) use of 2  $\mu$ L of diluted adapter-ligated molecules from the total 20  $\mu$ L volume in the PCR reaction (10-fold dilution, see below). The five serial dilutions resulted in final dilution factors of  $10^3$ ,  $10^4$ ,  $10^5$ ,  $10^6$ , and  $10^7$ . The minimum amount of input DNA per library was 3.4 ng.

**PCR amplification of diluted Y-adapter-ligated molecules.** Custom HPLC-purified PCR primers (IDT), TS-PCR Oligo1 (5'-AATGATACGGCGACCACCGAG\*A) and TS-PCR Oligo2 (5'-CAAGCAGAAGACGGCATACGA\*G), were designed with one phosphorothioated bond (\*) at the 3' end. PCR was performed in 50  $\mu$ L total volume with 0.5  $\mu$ M TS-PCR Oligo1, 0.5  $\mu$ M TS-PCR Oligo2, Q5 2X HotStart High-Fidelity Master Mix (NEB) at 1X final concentration, and 2  $\mu$ L of diluted adapter-ligated molecules as template. PCR was performed in Thermo HyBaid PCR Express HBPX Thermal Cycler. The following PCR program was used: 1) 98°C for 30 s 2) 98°C for 10 s, 69°C for 30 s, 72°C for 30 s for 18 or 20 cycles (see Table S1), and 3) 72° for 2 min. PCR reactions were purified with AMPure XP (Agilent) at 1.0X bead-to-sample ratio according to the manufacturer's protocol.

**MiSeq run and analysis.** A subset of amplified BotSeqS sequencing libraries was evaluated on an Illumina MiSeq instrument (~5 M clusters passed filter per library) to empirically deduce the optimal dilution. The "optimal dilution" was determined to result in 5 to 10 PCR duplicates per molecule when scaled to 1/2 lane of a HiSeq 2500 instrument (~70 M clusters passed filter per library in rapid run mode). For example, for an input of 500 ng gDNA into the TruSeq PCR-free library prep (selecting for 350 bp insert size), amplified libraries from the  $10^4$ -,  $10^5$ -,  $10^6$ -fold dilutions were sequenced at 2 x 50 bp depth on MiSeq. Three different well-barcoded samples (which were also molecularly barcoded) were multiplexed in one MiSeq lane to test three dilutions of each sample. The .bam output files were uploaded into Galaxy, and Picard's Estimate Library Complexity Tool (Galaxy Tool Version 1.56.0) was executed using the default parameters. Optimal dilutions showed distributions ranging from one to four members per family with singletons comprising ~60-80% of total counts. In general, with an input of 500 ng of gDNA into the TruSeq PCR-free library prep, the  $10^5$ -fold dilution yielded

~10 members per family on a subsequent HiSeq run used for BotSeqS. From our sequencing data, we estimate the average number of high quality clusters required to identify one rare mutation in colonic tissues was (1) 30 M in a normal child, (2) 12 M in a normal young adult, and (3) 5.8 M in a normal old adult.

**Whole-genome sequencing.** Thirty-two whole-genome sequencing (WGS) libraries were generated from the 34 individuals in this study. In the remaining two individuals without WGS, COL238 and COL239, Sanger sequence was performed to exclude clonal variants in the BotSeqS data. Of the final 20  $\mu$ L of adapter-ligated molecules used to prepare BotSeqS libraries (prior to dilution), 10  $\mu$ L was used to amplify a library for whole-genome sequencing using TruSeq PCR Primer Cocktail (Illumina) and TruSeq PCR Master Mix (Illumina) according to TruSeq PCR protocol. PCR reactions were purified with AMPure XP (Agilent) at 1.0X bead-to-sample ratio according to the manufacturer's instructions. The libraries were PE sequenced 2x100 bp on Illumina HiSeq 2500 at >30x coverage.

**Characterization of BotSeqS sensitivity.** Two DNA mixtures were prepared from the DNA of normal spleen samples PEN93 and PEN95. Whole genome sequence data was available from these two samples (1) and SNPs in PEN93 that were not present in PEN95 could be identified. Both mixtures contained the same amount of PEN95 DNA, but the low spike-in mix contained only 10% of the PEN93 DNA contained in the high spike-in mix. BotSeqS libraries from these samples were first analyzed using the normal BotSeqS pipeline to minimize clonal and germline mutations. Only a total of two mutations were detected among the two libraries; these two mutations likely represented rare mutations in the PEN95 sample, and suggest a mutation prevalence of  $\sim 8 \times 10^{-7}$  mutation/bp. Next, the data were processed through the BotSeqS pipeline *without* filtering out mutations that were present in dbSNP (build 130 and 142). Seven PEN93-specific SNPs in the low spike-in and 89 PEN93-specific SNPs in the high spike-in mixtures were identified. After normalizing for the number of sequenced bases, the "mutation prevalence" (number of PEN93-specific SNPs/bp) was  $2.7 \times 10^{-6}$  for the low spike-in and  $2.0 \times 10^{-5}$  for the high spike-in samples. The difference between the low spike-in and the high spike-in was 7.4-fold, within the range expected from the 10-fold dilution given the relatively low number of mutations identified in the low spike-in sample.

Sensitivity is one to a few cells, as follows: one human cell has  $\sim 1.3 \times 10^7$  nuclear DNA "molecules", estimated based on each molecule being 500 bp in size (approximate library insert size). Based on the amount of DNA originally purified from each tissue (corresponding to a median of 1.2 M cells), the BotSeqS dilution process resulted in the assessment of  $\sim 60,000$  nuclear DNA molecules per library. One way to assess sensitivity in terms of cells is to calculate the probability that, given we have picked a molecule from a specific cell, at least one other DNA molecule in the BotSeqS library was from the same cell. This can be modeled as a conditional binomial probability (using the *pbinom* functions of the R software):  $(1 - \text{pbinom}(1, 60000, 1/1200000)) / (1 - \text{pbinom}(0, 60000, 1/1200000)) = 0.025$ . The probability that at least 3 molecules were from the same cell is then  $(1 - \text{pbinom}(2, 60000, 1/1200000)) / (1 -$

$\text{pbinom}(0,60000,1/1200000) = 0.00041$ . The probability that at least 4 molecules were from that same cell is  $(1 - \text{pbinom}(3,60000,1/1200000))/ (1 - \text{dbinom}(0,60000,1/1200000)) = 5.1\text{e-}06$ . And the probability that at least 5 molecules will be from that same cell is  $(1 - \text{pbinom}(4,60000,1/1200000))/ (1 - \text{dbinom}(0,60000,1/1200000)) = 5.1\text{e-}08$ .

As with the nuclear genome, we used a conditional binomial distribution to estimate the probability that at least two mtDNA molecules were from the same cell. We evaluated ~3,400 mtDNA molecules per BotSeqS library. The probability that, given we have picked a mtDNA molecule from a specific cell, at least another one of the 3,400 mtDNA molecules was from the same cell is  $(1 - \text{pbinom}(1,3400,1/1200000))/ (1 - \text{pbinom}(0,3400,1/1200000)) = 0.0014$ . The probability that at least 3 molecules were from the same cell is then  $(1 - \text{pbinom}(2,3400,1/1200000))/ (1 - \text{pbinom}(0,3400,1/1200000)) = 1.3\text{e-}06$ . The probability that at least 4 molecules were from that same cell is  $(1 - \text{pbinom}(3,3400,1/1200000))/ (1 - \text{dbinom}(0,3400,1/1200000)) = 9.5\text{e-}10$ . And the probability that at least 5 molecules were from that same cell is  $(1 - \text{pbinom}(4,3400,1/1200000))/ (1 - \text{dbinom}(0,3400,1/1200000)) = 5.5\text{e-}13$ .

**Characterization of BotSeqS specificity.** As one measure of specificity, we identified *rare* mutations as usual except that we used mutations that were present in only one strand rather than in both. Specifically, mutations were present in  $\geq 90\%$  of the Watson family members and the reference sequence was present in  $\geq 90\%$  of the Crick family members, or vice versa, but satisfied our other criteria for being "rare". We then created false Watson and Crick pairings, where the Watson strand had overlapping but different coordinates than the Crick strand, and vice versa, to determine if they contained the same mutation by chance. BotSeqS works by having low coverage throughout the genome, generated through the bottleneck dilution step, and precluded this analysis in the nuclear DNA. Instead, we used mtDNA because of the multiple copies of mtDNA per cell. The coverage of mtDNA with BotSeqS is much higher than that of nuclear DNA and facilitated the identification of overlapping molecules. We processed 30 BotSeqS control libraries this way and identified a total of 146 mtDNA mutations present in one strand only. Using this dataset, we then searched within each sample for overlapping molecules and identified 27 examples. None of the 27 false Watson and Crick pairs shared the same artifactual mutation.

Non-random shearing could produce another type of artifact, falsely suggesting that the Watson and Crick strands of a family were actually derived from two different molecules that coincidentally had the same genomic coordinate. To test for such artifacts, we identified Watson and Crick family pairs that contained the variant in the Watson strand and the reference sequence in the Crick strand, or vice versa, but this time included heterozygous germline variants rather than just the rare variants, and in nuclear DNA rather than in mtDNA. There are many more heterozygous variants in nuclear DNA than in mtDNA because the mtDNA is derived only from the oocyte. The discordances of interest could arise as a result of mispairing of a Watson strand with a Crick strand derived from a different template molecule - i.e., non-random shearing. Alternatively, discordances could result from an amplification error in one of the two strands during an early PCR cycle. Using our WGS data, we first identified 8,535,891 nuclear

heterozygous variants observed among the 30 BotSeqS control libraries (median of 268,180 variants per library with range 121,850 to 529,920, with the same common variants present in many libraries). From the 8,535,891 nuclear heterozygous variants, we identified a total of 3,960,818 families (median of 123,130 families per library with range 65,832 to 222,140) for which both strands could be evaluated. Of these, 3,960,807 families had the concordant sequence at the variant position in both strands; only 11 heterozygous variants were discordant (i.e., the variant was present in  $\geq 90\%$  of the Watson family members and the reference sequence was present in  $\geq 90\%$  of the Crick family members, or vice versa). The rate of discordant germline heterozygous variants was thus  $2.8 \times 10^{-6}$  (11 out of 3,960,818) per bp. This rate is compatible with the known error rate of high fidelity DNA polymerases and could easily represent an amplification error that occurred in one of the two strands during the first PCR cycle, so represents an overestimate of shearing artifacts. Furthermore, it is important to note that BotSeqS eliminates such amplification errors by requiring mutations to be observed on both strands. Because BotSeqS requires mutations to be observed on both strands, the actual false positive rate can be estimated to be  $\sim(1/3)(2.8 \times 10^{-6})(2.8 \times 10^{-6}) = 2.6 \times 10^{-12}$ .

**Generation of BotSeqS change and molecule tables.** Sequence alignments and variant calling were performed with the Illumina secondary analysis package (CASAVA 1.8) using ELANDv2 matching to the GRCh37/hg19 human reference genome. High-quality reads were selected for further analysis only if they satisfied all of the following criteria: (i) passed chastity filter, (ii) read mapped in a proper pair, (iii)  $\leq 5$  mismatches to reference sequence (for 100 bp read), and (iv) perfect identity to reference sequence within the first and last five bases of each read. Sequencing reads were grouped into families based on identical paired-end endogenous barcodes. From our 44 BotSeqS libraries, we calculated that unfiltered mtDNA families represent a median of 0.4% (range 0.08 – 2%) of total unfiltered families (mtDNA+nuclear) per library. This is the expected range in sequencing data based on no enrichment of mtDNA. The members of a family were further subdivided into the two possible sequencing orientations to determine the number of Watson and Crick-derived family members. Watson and Crick families had identical genomic coordinates with each end sequenced in opposite reads. Quality scores of identical changes within a family were calculated as the average among the family members. The output for each BotSeqS library was two annotated tables of changes and template molecules (i.e., families). Details outlined in Bottleneck Sequencing System Pipeline Supplemental Document.

### **Selection of high quality changes and molecules**

Custom algorithms were written in Microsoft SQL Server Management Studio to query the changes and molecules tables for each BotSeqS library. Selection criteria detailed in Table S2-S6. Selection was based on quality, clonality, and mappability of single-base pair substitutions. For example, it is known that one of the major sources of errors facing all short read alignment and variant callers are artifacts that arise when variants map to repetitive regions in the genome, including low complexity regions and copy number variants (2). The BotSeqS pipeline eliminates this universal error in a downstream step by filtering out the genomic noise from repetitive DNA and structural

variants (detailed in Table S6). Indels were excluded because they are prone to alignment artifacts and are about 10 times less frequent than spontaneous point mutations. High quality single-base substitutions were defined as those with average quality scores (within the family) of  $\geq Q30$  and with  $\geq 2$  reads and  $\geq 90\%$  mutation fraction in both the Watson and Crick strands. Variants were considered to be clonal if the variant position was present in the WGS data from that sample or observed in  $> 1$  template molecules (i.e., both strands of more than one UID). We also excluded any positions present in dbSNP130 or dbSNP142. We noticed that the dbSNP filtering drastically minimized recurrent sequencing or mapping artifacts and highly mutable regions. For example, homopolymer tracts ( $\geq 8$  bp) are mutation hotspots that flood the mutation list. We observed that nearly all were filtered out with dbSNP142. Finally, families that harbored  $> 1$  mutation were excluded as possible mapping artifacts. Details outlined in Bottleneck Sequencing System Pipeline Supplemental Document.

**Calculation of mutation prevalence.** Mutation prevalences were determined for each BotSeqS library (see Table S9) by dividing the total number of rare mutations by the total bp sequenced. The total bp sequenced was defined by number of families  $\times 2 \times$  read length of each family. The average length of the libraries was  $\sim 500$  bp such that the 100 bp paired-end reads were unlikely to overlap. Only templates with perfect identity to the reference sequence in the first and last 5 bp of every read were considered. We further trimmed the reads by excluding cycle 6 and 7 to ensure quality. Therefore, the actual read length was 88 bases ( $100 - 7 - 5 = 88$ ). For the samples from which technical replicate BotSeqS libraries were generated, the average mutation prevalence of the technical replicates was considered the mutation prevalence for the sample.

**Validation of somatic mutations.** All rare mutations from the nuclear and mtDNA genome passed visual inspection of the sequencing reads. For rare nuclear mutations, Sanger sequencing was performed on a representative set (514 out of 876 mutations). Of these, 514 of 514 (100%) were confirmed to be invisible by Sanger sequencing (excluding the COL238 and COL239 samples that did not have a matched WGS). This demonstrated that these mutations were neither present in the germline nor present in a highly clonal fashion. Mutations confirmed to be absent upon Sanger sequencing are indicated in Table S8.

**Comparison to cancer genomes.** MAF files representing nuclear somatic mutations from TCGA tumor types COADREAD and KIRC were downloaded at <https://www.synapse.org/#!Synapse:syn1729383> (3). From the TCGA data, only single-base substitutions were considered and somatic mutations from ultra-mutated tumors were excluded. Mitochondrial DNA somatic mutations from colorectal and renal tumors were derived from supplementary file 2 of a previous report (4).

**Study design and statistical analysis.** For study design, no prior power analysis or randomization was performed because the variance was initially unknown. The goal of the study was to find major, biologically meaningful differences between the cohorts. To find major differences, sample sizes can be small. The initial rationale for the sample

size for colon and brain was to acquire at least three individuals in each age group in order to understand the average trend of somatic mutational patterns for each age group. Age groups for colon and brain were selected based on human body growth and maintenance: early body development at < 10 years, fully grown young adult body at ~20-40 years, and old, maintained adult body at > 90 years. For colon, one tissue from the young child age group (SIN230) was later determined to be duodenum, leaving only two individuals representing the young child age group for colon epithelium. For normal kidney, criteria for kidney acquisition were an age-matched and non-smoking control group for the kidneys of smokers and aristolochic acid-exposed samples. All normal kidney controls were Caucasian and therefore less likely to originate from a high risk AA-exposed population (e.g. Asia). From the same kidney tissue source, three aliquots of flash frozen, post-mortem normal kidney from a five month old individual were available as technical replicates and to further test an age-trend for non-carcinogen exposed normal kidneys. All analyzed samples were reported in the manuscript.

Even with the small sample size, no violations of the assumptions of the tests were detected, including violations about the homogeneity of variances. T-test and ANOVA analyses were performed using GraphPad Prism 5.0f. Fisher's exact test and principal component analysis was performed using R version 3.2.2.

1. Jiao Y, et al. (2011) DAXX/ATRAX, MEN1, and mTOR pathway genes are frequently altered in pancreatic neuroendocrine tumors. *Science* 331(6021):1199-1203.
2. Li H (2014) Toward better understanding of artifacts in variant calling from high-coverage samples. *Bioinformatics* 30(20):2843-2851.
3. Kandoth C, et al. (2013) Mutational landscape and significance across 12 major cancer types. *Nature* 502(7471):333-339.
4. Ju YS, et al. (2014) Origins and functional consequences of somatic mitochondrial DNA mutations in human cancer. *eLife* 3.

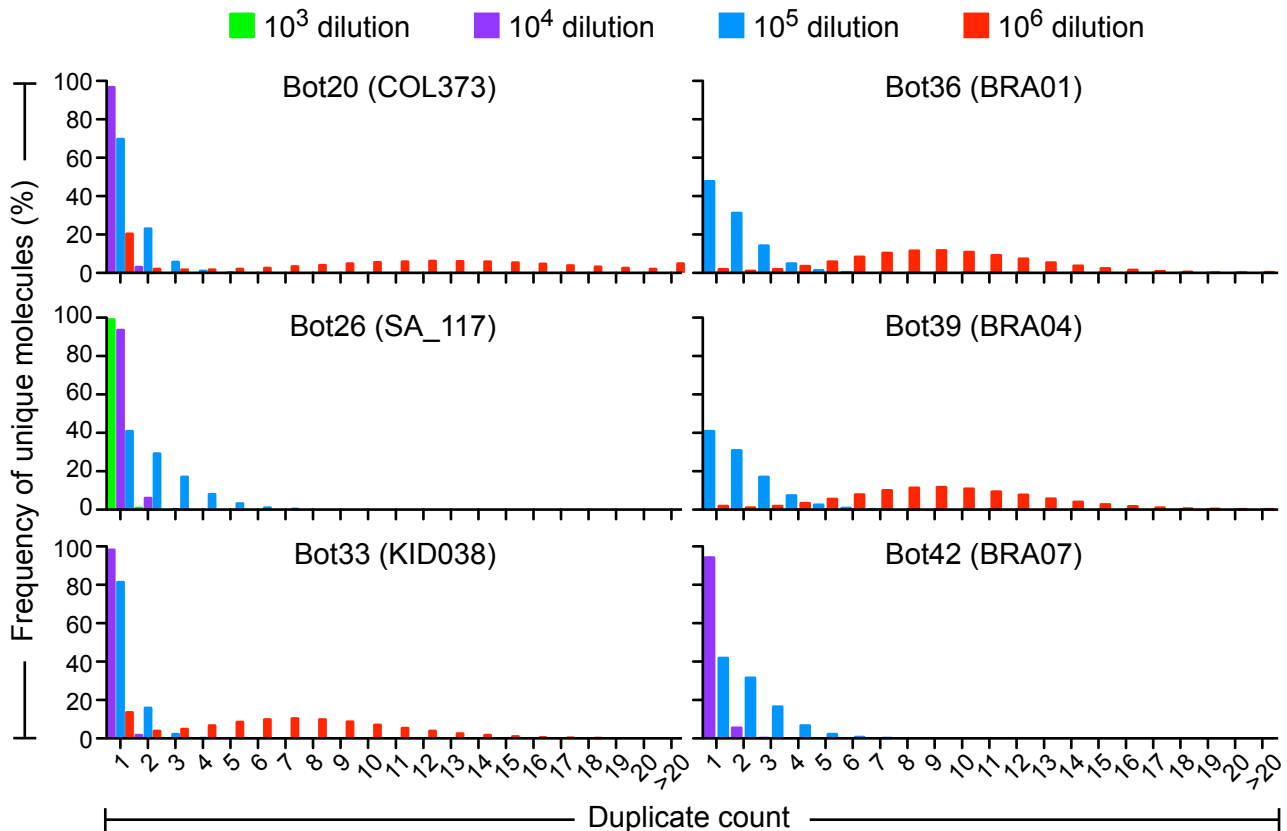

**Fig. S1. Assessment of duplicate counts with MiSeq prerun.** Histograms showing the distribution of UID family members (PCR duplicates from individual template molecules, shown on the x-axis). Either two or three serial dilutions ( $10^3$ ,  $10^4$ ,  $10^5$ , or  $10^6$ ) were evaluated on the MiSeq for six BotSeqS libraries (Bot20, Bot26, Bot33, Bot36, Bot39, Bot42) to generate ~5 M properly paired reads per library. Family member counts were determined here using Picard's Estimate Library Complexity program. Libraries generated from the  $10^5$  dilution (blue) were subsequently used for the final HiSeq run reported in this study. Note that the HiSeq distribution is expected to shift to the right compared to the MiSeq distribution due to the increase of clusters sequenced per library (~5 M clusters scaled to ~70 M clusters). For example, the BotSeqS libraries from the  $10^6$  dilution (red) were not used because the members per UID family would be too high on a HiSeq run, limiting the number of different families that could be evaluated with a given amount of sequencing.

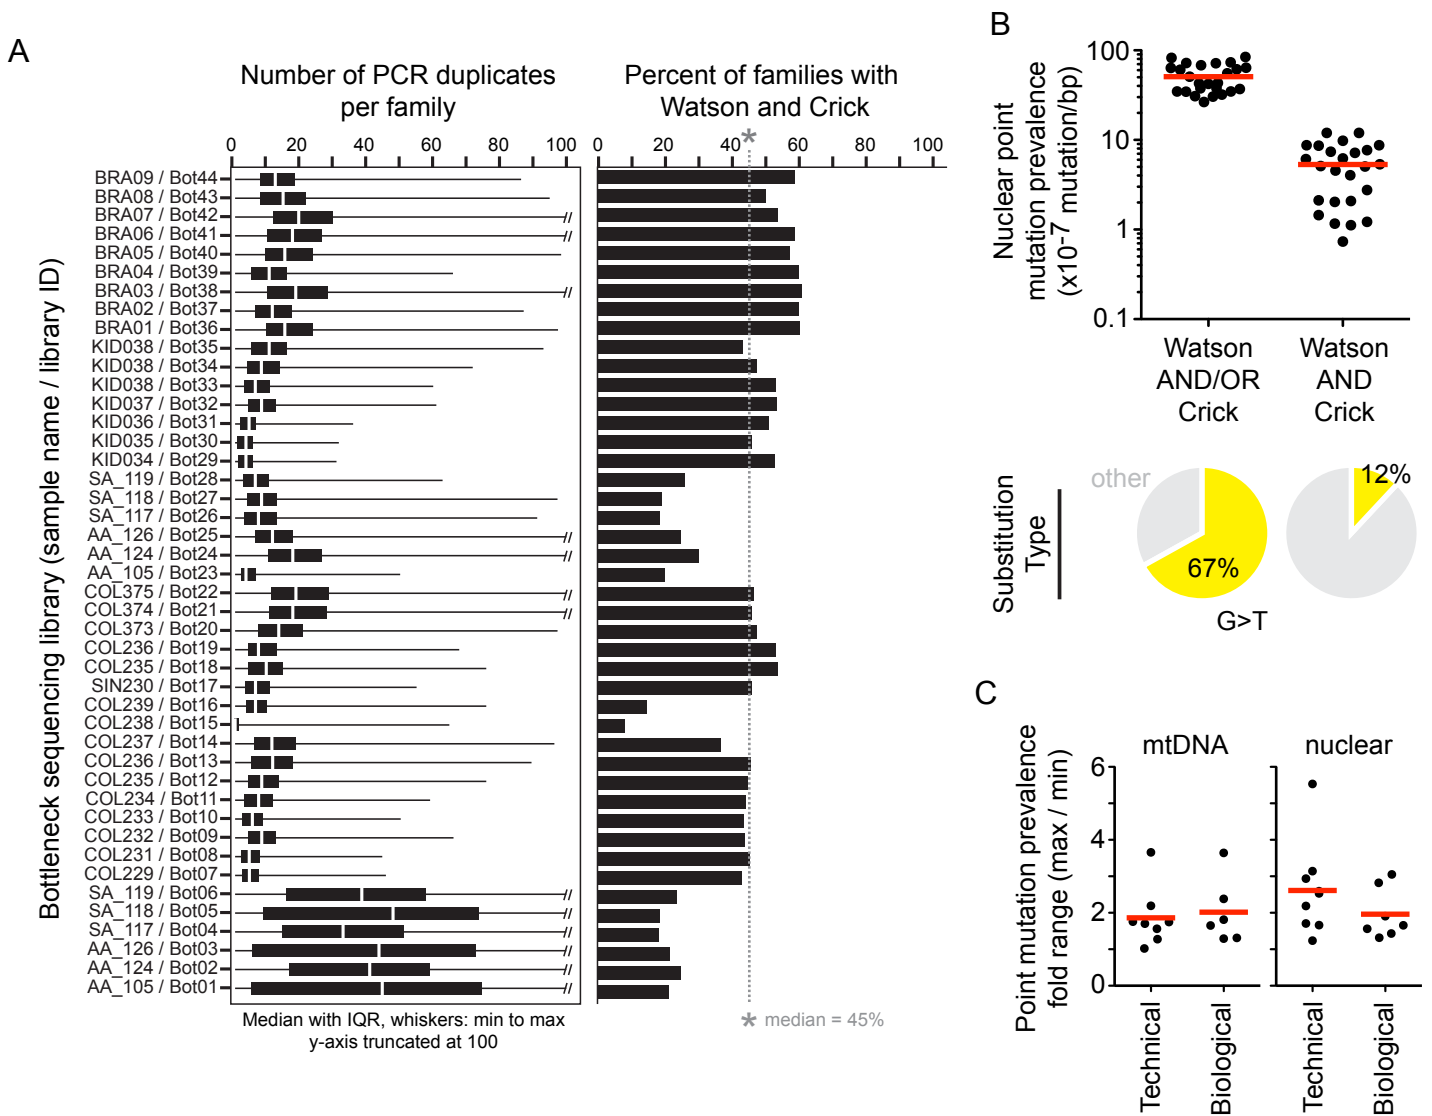

**Fig. S2. Methodological parameters in BotSeqS** (A) Left graph: horizontal box and whisker plots for 44 BotSeqS libraries (y-axis) and number of members per family (PCR duplicate count, x-axis). Filled boxes represent the first to third quartile range with hash mark indicating median. Whiskers represent minimum to maximum. Double slash of whisker indicates that maximum was truncated at 100. An average of 4 M (range 0.4 to 10 M) unfiltered families per library were assessed. Right graph: percent of unfiltered families with both Watson and Crick duplicate families present in each BotSeqS library. Grey dashed line indicates median. (B) Top graph: Nuclear point mutation prevalences (y-axis) considering mutations observed in “Watson AND/OR Crick” or “Watson AND Crick” families in normal tissues of 25 control individuals. “OR” mutations represent  $\geq 90\%$  mutation fraction in Watson family with a minimum of two Watson reads or  $\geq 90\%$  mutation fraction Crick family with a minimum of two Crick reads. “AND” mutations represent  $\geq 90\%$  mutation fraction in Watson family with a minimum of two Watson reads and  $\geq 90\%$  mutation fraction Crick family with a minimum of two Crick reads. “AND” mutations are an internal subset of the “AND/OR” dataset, which is a modified version of the BotSeqS pipeline. Red line indicates average. Bottom pie charts: frequency of G>T substitutions out of all possible substitution types (labeled as ‘other’) considering Watson AND/OR Crick (left pie chart) or Watson AND Crick (right pie chart) of 25 control individuals shown in top graph. Number of nuclear mutations generating mutational spectra for Watson AND/OR Crick was N=4415 and for Watson AND Crick was N=206. (C) Fold-range of point mutation prevalence of technical and biological BotSeqS replicates (details in Table S1) from mtDNA (left graph) and nuclear genome (right graph). Each point represents the ratio of the maximum to minimum of the replicate group. Red line indicates average.



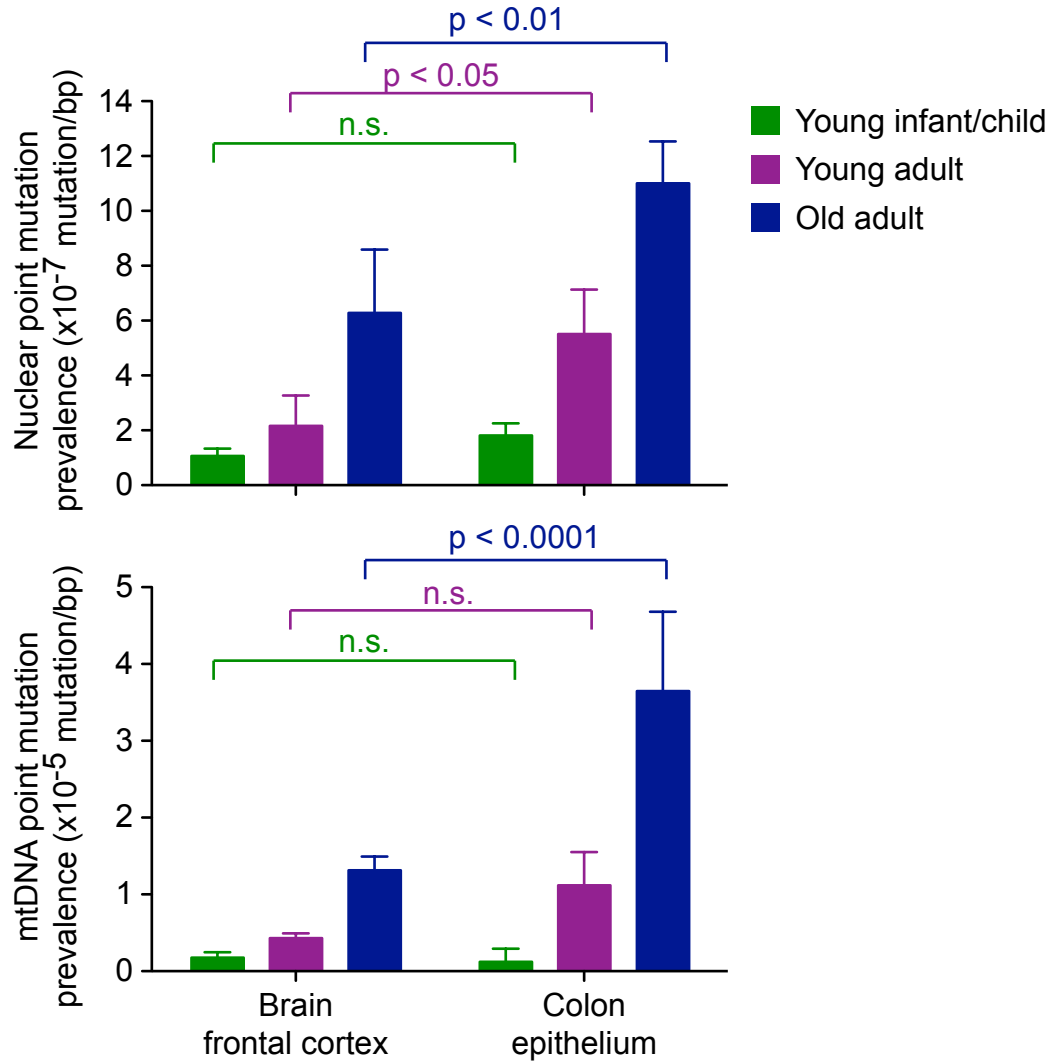

**Fig. S3. Rare point mutations accumulate in normal tissues of the colon more than in brain.** Point mutation prevalence (y-axis) in nuclear (top graph) and mitochondrial (bottom graph) genome in normal brain frontal cortex (left side) and normal colon epithelium (right side) grouped by age (young infant/child in green, young adult in purple, old adult in blue). Average +/- SD of each cohort shown. Two-way ANOVA with Bonferroni multiple comparison post-test was performed using GraphPad Prism 5.0f software with P values reported above bars. n.s. indicates P > 0.05. For brain, the number of individuals and average age of group are as follows- infant/child: N=3 (BRA01, BRA02, BRA03), 3.5 years old (y/o); young adult: N=3 (BRA04, BRA05, BRA06), 22 y/o; and old adult: N=3 (BRA07, BRA08, BRA09), 93 y/o. For colon, infant/child: N=2 (COL229, COL231), 5.5 y/o ; young adult: N=6 (COL235, COL236, COL237, COL373, COL374, COL375), 28 y/o; old adult: N=3 (COL232, COL233, COL234), 96 y/o.

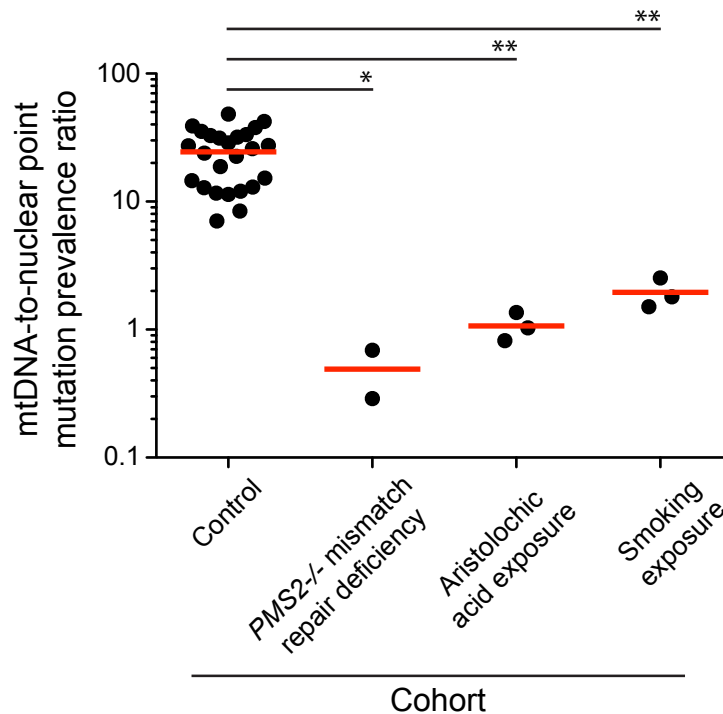

**Fig. S4. Mitochondrial and nuclear point mutation prevalences in normal tissues from the same individual.** Data points represent the ratio between mitochondrial to nuclear point mutation prevalences (y-axis) within the normal tissue of each individual. Individuals were grouped into four cohorts (x-axis) with N=24 for Control (see Table S9), N=2 (COL238, COL239) for *PMS2*<sup>-/-</sup> mismatch repair deficiency, N=3 (AA\_105, AA\_124, AA\_126) for aristolochic acid exposure, and N=3 individuals (SA\_117, SA\_118, SA\_119) for smoking exposure. One ratio from the control cohort (COL229) was zero and omitted from this analysis. Average (red line) ratio for each cohort is 25 for Control, 0.5 for DNA repair defect *PMS2*<sup>-/-</sup>, 1.1 for aristolochic acid exposure, and 2.0 for smoking exposure. \*P < 0.05, \*\*P < 0.01, one-way ANOVA with Bonferroni multiple comparison post-test.

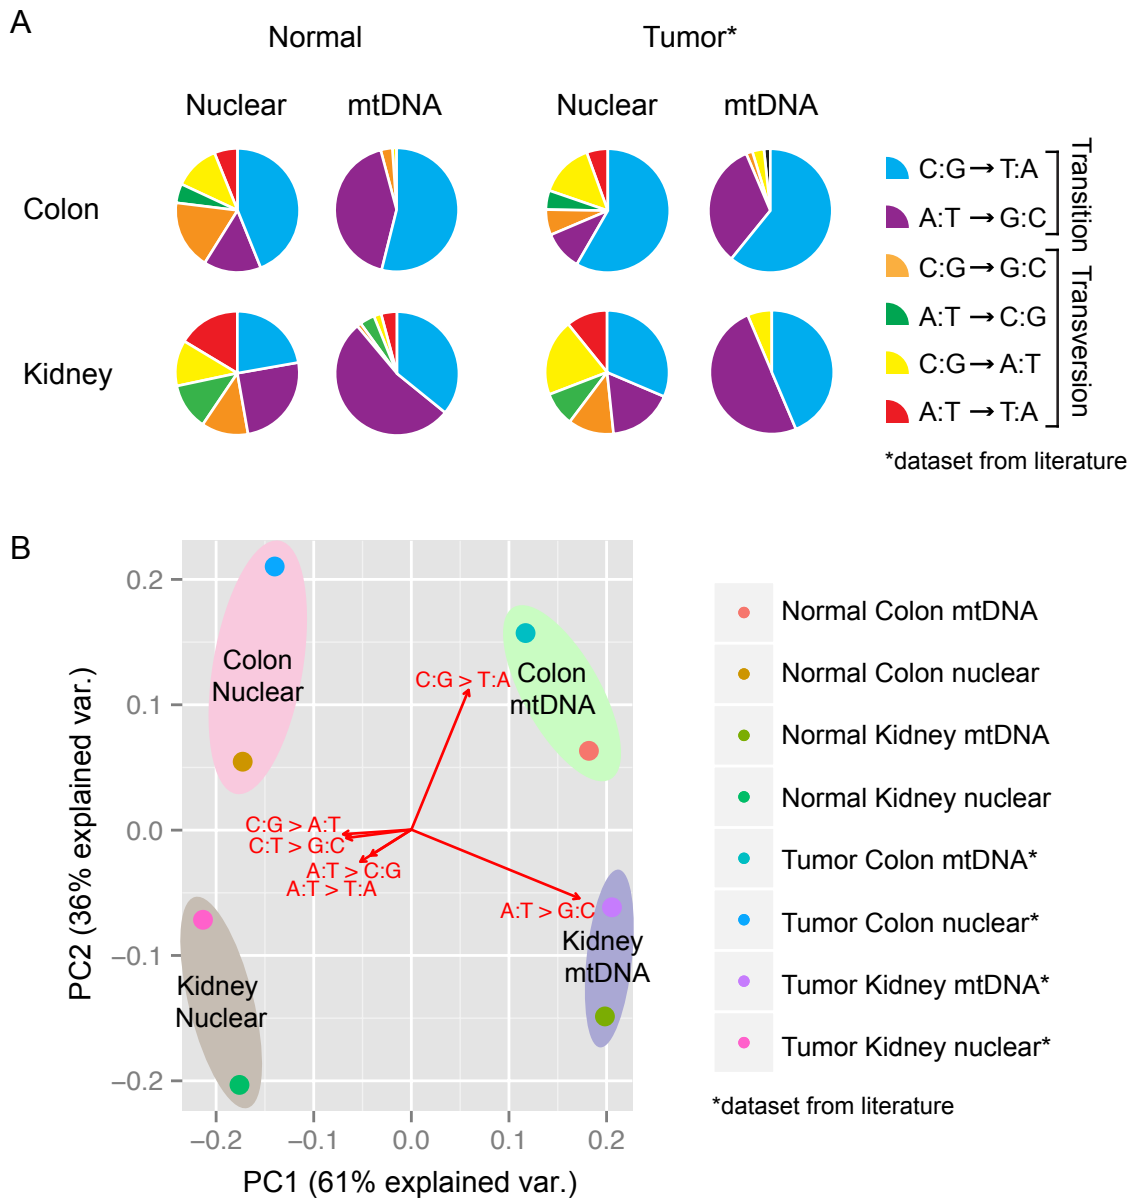

**Fig. S5. Normal tissues and tumors derived from the same tissue type have similar mutation spectra** (A) Pie charts of nuclear and mitochondrial substitution types out of six possible (see legend) comparing normal (left side) and tumors (right side) derived from colon (top) and kidney (bottom). "Normal" represents the rare mutational spectra data derived from normal tissues shown in Fig. 3. "Tumor" nuclear mutations represent clonal mutation data from colorectal carcinomas (COAD/READ) and clear cell renal carcinoma (KIRC) from the TCGA dataset acquired from [www.synapse.org/#!Synapse:syn1729383](http://www.synapse.org/#!Synapse:syn1729383). "Tumor" mtDNA mutations from colon and kidney were acquired from "colorectal" and "renal" tumor types in supplementary file 2 of Ju et al., 2014. For normal tissues, the number of substitutions assessed was as follows: colon nuclear N=94 from 13 individuals, colon mtDNA N=116 from 12 individuals, kidney nuclear N=73 from 7 individuals, and kidney mtDNA N=299 from five individuals. For tumor tissue, the number of substitutions assessed was as follows: colorectal carcinoma nuclear N=18,538 from 193 individuals, colorectal carcinoma mtDNA N=64 from 76 individuals, clear cell renal cell carcinoma nuclear N=24,559 from 417 individuals, and renal carcinoma mtDNA N=16 from 23 individuals. (B) Principal component analysis (PCA) of mutational spectra from the cohorts indicated in (A). PCA performed and graphed using R software.

## SI BotSeqS Pipeline Supplement

### 1 Summary

Bottleneck Sequencing System (BotSeqS) is an unbiased next-generation sequencing (NGS) method designed to accurately quantitate extremely rare, or “nonclonal”, somatic mutations from a population of cells. Our initial application of BotSeqS was on human tissue samples using the Illumina sequencing platform. Therefore the BotSeqS pipeline described here is specific to human samples and Illumina sequencing. However, in principal, BotSeqS may be developed with any type of cell population, organism, and/or high throughput sequencing platform.

The goal of BotSeqS data processing is to accurately calculate the genome-wide mutation prevalence for nuclear DNA and mitochondrial DNA (mtDNA) per sample. The pipeline can be broken down into three phases as shown in Figure 1: (1) Alignment and variant calling, (2) Listing reference differences (or “changes”) and unique molecules annotated with counts and quality parameters, and (3) selection of high confidence rare mutations and molecules.

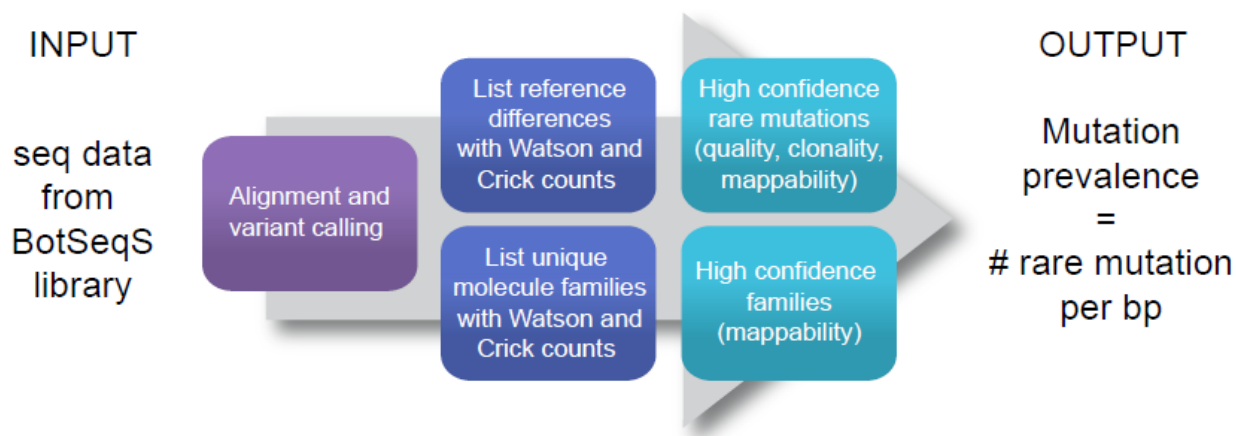

### 2 Illumina sequencing data outputs

Two libraries were generated for each sample, whole-genome sequencing (WGS) and bottleneck sequencing library (BOT).

1. WGS libraries were sequenced to >30x average coverage. Variants were aligned and called using Illumina’s Isaac algorithm. BotSeqS pipeline worked with variants tabulated in the genome variant call format (gVCF). This information facilitated the identification of somatic mutations in the BOT libraries. For example, about 90% of reference differences in BOT libraries were germline or clonal variants present in the WGS, and therefore filtered out.

2. BOT libraries were pair-ended sequenced at 2 x 100 bp with an average of 73 M clusters pass filter (about one-half lane of Illumina HiSeq 2500 on rapid run mode). Sequencing data were processed through Illumina's on machine secondary analysis CASAVA 1.8. This program included ELANDv2 alignment to hg19 and variant calling. The output of BOT data was an Illumina export txt file with 22 columns (for details of Illumina column information, please refer to [http://support.illumina.com/help/SequencingAnalysisWorkflow/Content/Vault/Informatics/Sequencing\\_Analysis/CASAVA/swSEQ\\_mCA\\_Exporttxt.htm](http://support.illumina.com/help/SequencingAnalysisWorkflow/Content/Vault/Informatics/Sequencing_Analysis/CASAVA/swSEQ_mCA_Exporttxt.htm)).

### 3 Data pre-processing and structure

Microsoft Sequel (SQL) Server Management Studio software was used for the majority of the data processing steps. BOT export files were first processed through our custom pipeline used for Illumina DNA sequencing studies. Because this pre-processing pipeline was developed specifically for our in-house hardware structure, it is not useful for off-site reproduction and therefore not included here. However, below we describe the output of our custom pipeline pre-processing. The output data structure is important to understand as it was the basis for the following SQL queries we provide further below.

SQL outputted the following 885 tables for each BOT library. Tables 1-6 include experimental information, processing criteria, and summary sheets. The remaining tables were organized into chromosomal regions, with each region associated with three tables: changes, coverage, and tags. The human genome was arbitrarily split into a number of different regions to increase processing speed.

1. ConsolidatedChanges
2. Experiment
3. ExperimentSummary
4. ImportedFiles
5. RoiCoverage
6. Sample
7. Zchr1\_10Changes
8. Zchr1\_10Coverage
9. Zchr1\_10Tags
10. Zchr1\_11Changes
11. Zchr1\_11Coverage
12. Zchr1\_11Tags
13. Zchr1\_12Changes
14. Zchr1\_12Coverage
15. Zchr1\_12Tags
16. Zchr1\_13Changes
17. Zchr1\_13Coverage
18. Zchr1\_13Tags
19. Zchr1\_14Changes
20. Zchr1\_14Coverage
21. Zchr1\_14Tags
22. Zchr1\_15Changes
23. Zchr1\_15Coverage
24. Zchr1\_15Tags
25. Zchr1\_16Changes

26. Zchr1\_16Coverage  
27. Zchr1\_16Tags  
28. Zchr1\_17Changes  
29. Zchr1\_17Coverage  
30. Zchr1\_17Tags  
31. Zchr1\_18Changes  
32. Zchr1\_18Coverage  
33. Zchr1\_18Tags  
34. Zchr1\_19Changes  
35. Zchr1\_19Coverage  
36. Zchr1\_19Tags  
37. Zchr1\_1Changes  
38. Zchr1\_1Coverage  
39. Zchr1\_1Tags  
40. Zchr1\_20Changes  
41. Zchr1\_20Coverage  
42. Zchr1\_20Tags  
43. Zchr1\_21Changes  
44. Zchr1\_21Coverage  
45. Zchr1\_21Tags  
46. Zchr1\_22Changes  
47. Zchr1\_22Coverage  
48. Zchr1\_22Tags  
49. Zchr1\_23Changes  
50. Zchr1\_23Coverage  
51. Zchr1\_23Tags  
52. Zchr1\_24Changes  
53. Zchr1\_24Coverage  
54. Zchr1\_24Tags  
55. Zchr1\_25Changes  
56. Zchr1\_25Coverage  
57. Zchr1\_25Tags  
58. Zchr1\_26Changes  
59. Zchr1\_26Coverage  
60. Zchr1\_26Tags  
61. Zchr1\_27Changes  
62. Zchr1\_27Coverage  
63. Zchr1\_27Tags  
64. Zchr1\_28Changes  
65. Zchr1\_28Coverage  
66. Zchr1\_28Tags  
67. Zchr1\_29Changes  
68. Zchr1\_29Coverage  
69. Zchr1\_29Tags  
70. Zchr1\_2Changes  
71. Zchr1\_2Coverage  
72. Zchr1\_2Tags  
73. Zchr1\_30Changes  
74. Zchr1\_30Coverage  
75. Zchr1\_30Tags  
76. Zchr1\_31Changes  
77. Zchr1\_31Coverage  
78. Zchr1\_31Tags  
79. Zchr1\_32Changes  
80. Zchr1\_32Coverage  
81. Zchr1\_32Tags  
82. Zchr1\_33Changes  
83. Zchr1\_33Coverage  
84. Zchr1\_33Tags  
85. Zchr1\_34Changes  
86. Zchr1\_34Coverage  
87. Zchr1\_34Tags

88. Zchr1\_35Changes  
89. Zchr1\_35Coverage  
90. Zchr1\_35Tags  
91. Zchr1\_36Changes  
92. Zchr1\_36Coverage  
93. Zchr1\_36Tags  
94. Zchr1\_37Changes  
95. Zchr1\_37Coverage  
96. Zchr1\_37Tags  
97. Zchr1\_38Changes  
98. Zchr1\_38Coverage  
99. Zchr1\_38Tags  
100.Zchr1\_3Changes  
101.Zchr1\_3Coverage  
102.Zchr1\_3Tags  
103.Zchr1\_4Changes  
104.Zchr1\_4Coverage  
105.Zchr1\_4Tags  
106.Zchr1\_5Changes  
107.Zchr1\_5Coverage  
108.Zchr1\_5Tags  
109.Zchr1\_6Changes  
110.Zchr1\_6Coverage  
111.Zchr1\_6Tags  
112.Zchr1\_7Changes  
113.Zchr1\_7Coverage  
114.Zchr1\_7Tags  
115.Zchr1\_8Changes  
116.Zchr1\_8Coverage  
117.Zchr1\_8Tags  
118.Zchr1\_9Changes  
119.Zchr1\_9Coverage  
120.Zchr1\_9Tags  
121.Zchr10\_10Changes  
122.Zchr10\_10Coverage  
123.Zchr10\_10Tags  
124.Zchr10\_11Changes  
125.Zchr10\_11Coverage  
126.Zchr10\_11Tags  
127.Zchr10\_12Changes  
128.Zchr10\_12Coverage  
129.Zchr10\_12Tags  
130.Zchr10\_13Changes  
131.Zchr10\_13Coverage  
132.Zchr10\_13Tags  
133.Zchr10\_14Changes  
134.Zchr10\_14Coverage  
135.Zchr10\_14Tags  
136.Zchr10\_15Changes  
137.Zchr10\_15Coverage  
138.Zchr10\_15Tags  
139.Zchr10\_16Changes  
140.Zchr10\_16Coverage  
141.Zchr10\_16Tags  
142.Zchr10\_1Changes  
143.Zchr10\_1Coverage  
144.Zchr10\_1Tags  
145.Zchr10\_2Changes  
146.Zchr10\_2Coverage  
147.Zchr10\_2Tags  
148.Zchr10\_3Changes  
149.Zchr10\_3Coverage

150.Zchr10\_3Tags  
151.Zchr10\_4Changes  
152.Zchr10\_4Coverage  
153.Zchr10\_4Tags  
154.Zchr10\_5Changes  
155.Zchr10\_5Coverage  
156.Zchr10\_5Tags  
157.Zchr10\_6Changes  
158.Zchr10\_6Coverage  
159.Zchr10\_6Tags  
160.Zchr10\_7Changes  
161.Zchr10\_7Coverage  
162.Zchr10\_7Tags  
163.Zchr10\_8Changes  
164.Zchr10\_8Coverage  
165.Zchr10\_8Tags  
166.Zchr10\_9Changes  
167.Zchr10\_9Coverage  
168.Zchr10\_9Tags  
169.Zchr11\_1Changes  
170.Zchr11\_1Coverage  
171.Zchr11\_1Tags  
172.Zchr11\_2Changes  
173.Zchr11\_2Coverage  
174.Zchr11\_2Tags  
175.Zchr11\_3Changes  
176.Zchr11\_3Coverage  
177.Zchr11\_3Tags  
178.Zchr11\_4Changes  
179.Zchr11\_4Coverage  
180.Zchr11\_4Tags  
181.Zchr11\_5Changes  
182.Zchr11\_5Coverage  
183.Zchr11\_5Tags  
184.Zchr11\_6Changes  
185.Zchr11\_6Coverage  
186.Zchr11\_6Tags  
187.Zchr11\_7Changes  
188.Zchr11\_7Coverage  
189.Zchr11\_7Tags  
190.Zchr11\_8Changes  
191.Zchr11\_8Coverage  
192.Zchr11\_8Tags  
193.Zchr12\_10Changes  
194.Zchr12\_10Coverage  
195.Zchr12\_10Tags  
196.Zchr12\_1Changes  
197.Zchr12\_1Coverage  
198.Zchr12\_1Tags  
199.Zchr12\_2Changes  
200.Zchr12\_2Coverage  
201.Zchr12\_2Tags  
202.Zchr12\_3Changes  
203.Zchr12\_3Coverage  
204.Zchr12\_3Tags  
205.Zchr12\_4Changes  
206.Zchr12\_4Coverage  
207.Zchr12\_4Tags  
208.Zchr12\_5Changes  
209.Zchr12\_5Coverage  
210.Zchr12\_5Tags  
211.Zchr12\_6Changes



212.Zchr12\_6Coverage  
213.Zchr12\_6Tags  
214.Zchr12\_7Changes  
215.Zchr12\_7Coverage  
216.Zchr12\_7Tags  
217.Zchr12\_8Changes  
218.Zchr12\_8Coverage  
219.Zchr12\_8Tags  
220.Zchr12\_9Changes  
221.Zchr12\_9Coverage  
222.Zchr12\_9Tags  
223.Zchr13\_1Changes  
224.Zchr13\_1Coverage  
225.Zchr13\_1Tags  
226.Zchr13\_2Changes  
227.Zchr13\_2Coverage  
228.Zchr13\_2Tags  
229.Zchr13\_3Changes  
230.Zchr13\_3Coverage  
231.Zchr13\_3Tags  
232.Zchr13\_4Changes  
233.Zchr13\_4Coverage  
234.Zchr13\_4Tags  
235.Zchr13\_5Changes  
236.Zchr13\_5Coverage  
237.Zchr13\_5Tags  
238.Zchr14\_1Changes  
239.Zchr14\_1Coverage  
240.Zchr14\_1Tags  
241.Zchr15\_1Changes  
242.Zchr15\_1Coverage  
243.Zchr15\_1Tags  
244.Zchr15\_2Changes  
245.Zchr15\_2Coverage  
246.Zchr15\_2Tags  
247.Zchr15\_3Changes  
248.Zchr15\_3Coverage  
249.Zchr15\_3Tags  
250.Zchr15\_4Changes  
251.Zchr15\_4Coverage  
252.Zchr15\_4Tags  
253.Zchr15\_5Changes  
254.Zchr15\_5Coverage  
255.Zchr15\_5Tags  
256.Zchr15\_6Changes  
257.Zchr15\_6Coverage  
258.Zchr15\_6Tags  
259.Zchr15\_7Changes  
260.Zchr15\_7Coverage  
261.Zchr15\_7Tags  
262.Zchr15\_8Changes  
263.Zchr15\_8Coverage  
264.Zchr15\_8Tags  
265.Zchr15\_9Changes  
266.Zchr15\_9Coverage  
267.Zchr15\_9Tags  
268.Zchr16\_1Changes  
269.Zchr16\_1Coverage  
270.Zchr16\_1Tags  
271.Zchr16\_2Changes  
272.Zchr16\_2Coverage  
273.Zchr16\_2Tags

274.Zchr16\_3Changes  
275.Zchr16\_3Coverage  
276.Zchr16\_3Tags  
277.Zchr15\_4Changes  
278.Zchr15\_4Coverage  
279.Zchr15\_4Tags  
280.Zchr15\_5Changes  
281.Zchr15\_5Coverage  
282.Zchr15\_5Tags  
283.Zchr15\_6Changes  
284.Zchr15\_6Coverage  
285.Zchr15\_6Tags  
286.Zchr15\_7Changes  
287.Zchr15\_7Coverage  
288.Zchr15\_7Tags  
289.Zchr15\_8Changes  
290.Zchr15\_8Coverage  
291.Zchr15\_8Tags  
292.Zchr15\_9Changes  
293.Zchr15\_9Coverage  
294.Zchr15\_9Tags  
295.Zchr16\_1Changes  
296.Zchr16\_1Coverage  
297.Zchr16\_1Tags  
298.Zchr16\_2Changes  
299.Zchr16\_2Coverage  
300.Zchr16\_2Tags  
301.Zchr16\_3Changes  
302.Zchr16\_3Coverage  
303.Zchr16\_3Tags  
304.Zchr16\_4Changes  
305.Zchr16\_4Coverage  
306.Zchr16\_4Tags  
307.Zchr16\_5Changes  
308.Zchr16\_5Coverage  
309.Zchr16\_5Tags  
310.Zchr17\_1Changes  
311.Zchr17\_1Coverage  
312.Zchr17\_1Tags  
313.Zchr17\_2Changes  
314.Zchr17\_2Coverage  
315.Zchr17\_2Tags  
316.Zchr17\_3Changes  
317.Zchr17\_3Coverage  
318.Zchr17\_3Tags  
319.Zchr17\_4Changes  
320.Zchr17\_4Coverage  
321.Zchr17\_4Tags  
322.Zchr17\_5Changes  
323.Zchr17\_5Coverage  
324.Zchr17\_5Tags  
325.Zchr17\_6Changes  
326.Zchr17\_6Coverage  
327.Zchr17\_6Tags  
328.Zchr17\_7Changes  
329.Zchr17\_7Coverage  
330.Zchr17\_7Tags  
331.Zchr17\_8Changes  
332.Zchr17\_8Coverage  
333.Zchr17\_8Tags  
334.Zchr18\_1Changes  
335.Zchr18\_1Coverage

336.Zchr18\_1Tags  
337.Zchr18\_2Changes  
338.Zchr18\_2Coverage  
339.Zchr18\_2Tags  
340.Zchr18\_3Changes  
341.Zchr18\_3Coverage  
342.Zchr18\_3Tags  
343.Zchr18\_4Changes  
344.Zchr18\_4Coverage  
345.Zchr18\_4Tags  
346.Zchr18\_5Changes  
347.Zchr18\_5Coverage  
348.Zchr18\_5Tags  
349.Zchr19\_1Changes  
350.Zchr19\_1Coverage  
351.Zchr19\_1Tags  
352.Zchr19\_2Changes  
353.Zchr19\_2Coverage  
354.Zchr19\_2Tags  
355.Zchr19\_3Changes  
356.Zchr19\_3Coverage  
357.Zchr19\_3Tags  
358.Zchr19\_4Changes  
359.Zchr19\_4Coverage  
360.Zchr19\_4Tags  
361.Zchr19\_5Changes  
362.Zchr19\_5Coverage  
363.Zchr19\_5Tags  
364.Zchr2\_10Changes  
365.Zchr2\_10Coverage  
366.Zchr2\_10Tags  
367.Zchr2\_11Changes  
368.Zchr2\_11Coverage  
369.Zchr2\_11Tags  
370.Zchr2\_12Changes  
371.Zchr2\_12Coverage  
372.Zchr2\_12Tags  
373.Zchr2\_13Changes  
374.Zchr2\_13Coverage  
375.Zchr2\_13Tags  
376.Zchr2\_14Changes  
377.Zchr2\_14Coverage  
378.Zchr2\_14Tags  
379.Zchr2\_15Changes  
380.Zchr2\_15Coverage  
381.Zchr2\_15Tags  
382.Zchr2\_16Changes  
383.Zchr2\_16Coverage  
384.Zchr2\_16Tags  
385.Zchr2\_17Changes  
386.Zchr2\_17Coverage  
387.Zchr2\_17Tags  
388.Zchr2\_18Changes  
389.Zchr2\_18Coverage  
390.Zchr2\_18Tags  
391.Zchr2\_19Changes  
392.Zchr2\_19Coverage  
393.Zchr2\_19Tags  
394.Zchr2\_1Changes  
395.Zchr2\_1Coverage  
396.Zchr2\_1Tags  
397.Zchr2\_2Changes

398.Zchr2\_2Coverage  
399.Zchr2\_2Tags  
400.Zchr2\_3Changes  
401.Zchr2\_3Coverage  
402.Zchr2\_3Tags  
403.Zchr2\_4Changes  
404.Zchr2\_4Coverage  
405.Zchr2\_4Tags  
406.Zchr2\_5Changes  
407.Zchr2\_5Coverage  
408.Zchr2\_5Tags  
409.Zchr2\_6Changes  
410.Zchr2\_6Coverage  
411.Zchr2\_6Tags  
412.Zchr2\_7Changes  
413.Zchr2\_7Coverage  
414.Zchr2\_7Tags  
415.Zchr2\_8Changes  
416.Zchr2\_8Coverage  
417.Zchr2\_8Tags  
418.Zchr2\_9Changes  
419.Zchr2\_9Coverage  
420.Zchr2\_9Tags  
421.Zchr20\_1Changes  
422.Zchr20\_1Coverage  
423.Zchr20\_1Tags  
424.Zchr20\_2Changes  
425.Zchr20\_2Coverage  
426.Zchr20\_2Tags  
427.Zchr20\_3Changes  
428.Zchr20\_3Coverage  
429.Zchr20\_3Tags  
430.Zchr20\_4Changes  
431.Zchr20\_4Coverage  
432.Zchr20\_4Tags  
433.Zchr20\_5Changes  
434.Zchr20\_5Coverage  
435.Zchr20\_5Tags  
436.Zchr20\_6Changes  
437.Zchr20\_6Coverage  
438.Zchr20\_6Tags  
439.Zchr21\_10Changes  
440.Zchr21\_10Coverage  
441.Zchr21\_10Tags  
442.Zchr21\_11Changes  
443.Zchr21\_11Coverage  
444.Zchr21\_11Tags  
445.Zchr21\_1Changes  
446.Zchr21\_1Coverage  
447.Zchr21\_1Tags  
448.Zchr21\_2Changes  
449.Zchr21\_2Coverage  
450.Zchr21\_2Tags  
451.Zchr21\_3Changes  
452.Zchr21\_3Coverage  
453.Zchr21\_3Tags  
454.Zchr21\_4Changes  
455.Zchr21\_4Coverage  
456.Zchr21\_4Tags  
457.Zchr21\_5Changes  
458.Zchr21\_5Coverage  
459.Zchr21\_5Tags

460.Zchr21\_6Changes  
461.Zchr21\_6Coverage  
462.Zchr21\_6Tags  
463.Zchr21\_7Changes  
464.Zchr21\_7Coverage  
465.Zchr21\_7Tags  
466.Zchr21\_8Changes  
467.Zchr21\_8Coverage  
468.Zchr21\_8Tags  
469.Zchr21\_9Changes  
470.Zchr21\_9Coverage  
471.Zchr21\_9Tags  
472.Zchr22\_1Changes  
473.Zchr22\_1Coverage  
474.Zchr22\_1Tags  
475.Zchr22\_2Changes  
476.Zchr22\_2Coverage  
477.Zchr22\_2Tags  
478.Zchr22\_3Changes  
479.Zchr22\_3Coverage  
480.Zchr22\_3Tags  
481.Zchr22\_4Changes  
482.Zchr22\_4Coverage  
483.Zchr22\_4Tags  
484.Zchr3\_1Changes  
485.Zchr3\_1Coverage  
486.Zchr3\_1Tags  
487.Zchr3\_2Changes  
488.Zchr3\_2Coverage  
489.Zchr3\_2Tags  
490.Zchr3\_3Changes  
491.Zchr3\_3Coverage  
492.Zchr3\_3Tags  
493.Zchr3\_4Changes  
494.Zchr3\_4Coverage  
495.Zchr3\_4Tags  
496.Zchr4\_10Changes  
497.Zchr4\_10Coverage  
498.Zchr4\_10Tags  
499.Zchr4\_11Changes  
500.Zchr4\_11Coverage  
501.Zchr4\_11Tags  
502.Zchr4\_1Changes  
503.Zchr4\_1Coverage  
504.Zchr4\_1Tags  
505.Zchr4\_2Changes  
506.Zchr4\_2Coverage  
507.Zchr4\_2Tags  
508.Zchr4\_3Changes  
509.Zchr4\_3Coverage  
510.Zchr4\_3Tags  
511.Zchr4\_4Changes  
512.Zchr4\_4Coverage  
513.Zchr4\_4Tags  
514.Zchr4\_5Changes  
515.Zchr4\_5Coverage  
516.Zchr4\_5Tags  
517.Zchr4\_6Changes  
518.Zchr4\_6Coverage  
519.Zchr4\_6Tags  
520.Zchr4\_7Changes  
521.Zchr4\_7Coverage

522.Zchr4\_7Tags  
523.Zchr4\_8Changes  
524.Zchr4\_8Coverage  
525.Zchr4\_8Tags  
526.Zchr4\_9Changes  
527.Zchr4\_9Coverage  
528.Zchr4\_9Tags  
529.Zchr5\_1Changes  
530.Zchr5\_1Coverage  
531.Zchr5\_1Tags  
532.Zchr5\_2Changes  
533.Zchr5\_2Coverage  
534.Zchr5\_2Tags  
535.Zchr5\_3Changes  
536.Zchr5\_3Coverage  
537.Zchr5\_3Tags  
538.Zchr5\_4Changes  
539.Zchr5\_4Coverage  
540.Zchr5\_4Tags  
541.Zchr5\_5Changes  
542.Zchr5\_5Coverage  
543.Zchr5\_5Tags  
544.Zchr5\_6Changes  
545.Zchr5\_6Coverage  
546.Zchr5\_6Tags  
547.Zchr6\_1Changes  
548.Zchr6\_1Coverage  
549.Zchr6\_1Tags  
550.Zchr6\_2Changes  
551.Zchr6\_2Coverage  
552.Zchr6\_2Tags  
553.Zchr6\_3Changes  
554.Zchr6\_3Coverage  
555.Zchr6\_3Tags  
556.Zchr6\_4Changes  
557.Zchr6\_4Coverage  
558.Zchr6\_4Tags  
559.Zchr6\_5Changes  
560.Zchr6\_5Coverage  
561.Zchr6\_5Tags  
562.Zchr6\_6Changes  
563.Zchr6\_6Coverage  
564.Zchr6\_6Tags  
565.Zchr6\_7Changes  
566.Zchr6\_7Coverage  
567.Zchr6\_7Tags  
568.Zchr6\_8Changes  
569.Zchr6\_8Coverage  
570.Zchr6\_8Tags  
571.Zchr6\_9Changes  
572.Zchr6\_9Coverage  
573.Zchr6\_9Tags  
574.Zchr7\_10Changes  
575.Zchr7\_10Coverage  
576.Zchr7\_10Tags  
577.Zchr7\_11Changes  
578.Zchr7\_11Coverage  
579.Zchr7\_11Tags  
580.Zchr7\_12Changes  
581.Zchr7\_12Coverage  
582.Zchr7\_12Tags  
583.Zchr7\_13Changes

584.Zchr7\_13Coverage  
585.Zchr7\_13Tags  
586.Zchr7\_14Changes  
587.Zchr7\_14Coverage  
588.Zchr7\_14Tags  
589.Zchr7\_15Changes  
590.Zchr7\_15Coverage  
591.Zchr7\_15Tags  
592.Zchr7\_16Changes  
593.Zchr7\_16Coverage  
594.Zchr7\_16Tags  
595.Zchr7\_1Changes  
596.Zchr7\_1Coverage  
597.Zchr7\_1Tags  
598.Zchr7\_2Changes  
599.Zchr7\_2Coverage  
600.Zchr7\_2Tags  
601.Zchr7\_3Changes  
602.Zchr7\_3Coverage  
603.Zchr7\_3Tags  
604.Zchr7\_4Changes  
605.Zchr7\_4Coverage  
606.Zchr7\_4Tags  
607.Zchr7\_5Changes  
608.Zchr7\_5Coverage  
609.Zchr7\_5Tags  
610.Zchr7\_6Changes  
611.Zchr7\_6Coverage  
612.Zchr7\_6Tags  
613.Zchr7\_7Changes  
614.Zchr7\_7Coverage  
615.Zchr7\_7Tags  
616.Zchr7\_8Changes  
617.Zchr7\_8Coverage  
618.Zchr7\_8Tags  
619.Zchr7\_9Changes  
620.Zchr7\_9Coverage  
621.Zchr7\_9Tags  
622.Zchr8\_1Changes  
623.Zchr8\_1Coverage  
624.Zchr8\_1Tags  
625.Zchr8\_2Changes  
626.Zchr8\_2Coverage  
627.Zchr8\_2Tags  
628.Zchr8\_3Changes  
629.Zchr8\_3Coverage  
630.Zchr8\_3Tags  
631.Zchr8\_4Changes  
632.Zchr8\_4Coverage  
633.Zchr8\_4Tags  
634.Zchr8\_5Changes  
635.Zchr8\_5Coverage  
636.Zchr8\_5Tags  
637.Zchr8\_6Changes  
638.Zchr8\_6Coverage  
639.Zchr8\_6Tags  
640.Zchr8\_7Changes  
641.Zchr8\_7Coverage  
642.Zchr8\_7Tags  
643.Zchr8\_8Changes  
644.Zchr8\_8Coverage  
645.Zchr8\_8Tags

646.Zchr9\_10Changes  
647.Zchr9\_10Coverage  
648.Zchr9\_10Tags  
649.Zchr9\_11Changes  
650.Zchr9\_11Coverage  
651.Zchr9\_11Tags  
652.Zchr9\_12Changes  
653.Zchr9\_12Coverage  
654.Zchr9\_12Tags  
655.Zchr9\_13Changes  
656.Zchr9\_13Coverage  
657.Zchr9\_13Tags  
658.Zchr9\_14Changes  
659.Zchr9\_14Coverage  
660.Zchr9\_14Tags  
661.Zchr9\_15Changes  
662.Zchr9\_15Coverage  
663.Zchr9\_15Tags  
664.Zchr9\_16Changes  
665.Zchr9\_16Coverage  
666.Zchr9\_16Tags  
667.Zchr9\_17Changes  
668.Zchr9\_17Coverage  
669.Zchr9\_17Tags  
670.Zchr9\_18Changes  
671.Zchr9\_18Coverage  
672.Zchr9\_18Tags  
673.Zchr9\_19Changes  
674.Zchr9\_19Coverage  
675.Zchr9\_19Tags  
676.Zchr9\_1Changes  
677.Zchr9\_1Coverage  
678.Zchr9\_1Tags  
679.Zchr9\_20Changes  
680.Zchr9\_20Coverage  
681.Zchr9\_20Tags  
682.Zchr9\_21Changes  
683.Zchr9\_21Coverage  
684.Zchr9\_21Tags  
685.Zchr9\_22Changes  
686.Zchr9\_22Coverage  
687.Zchr9\_22Tags  
688.Zchr9\_23Changes  
689.Zchr9\_23Coverage  
690.Zchr9\_23Tags  
691.Zchr9\_24Changes  
692.Zchr9\_24Coverage  
693.Zchr9\_24Tags  
694.Zchr9\_25Changes  
695.Zchr9\_25Coverage  
696.Zchr9\_25Tags  
697.Zchr9\_26Changes  
698.Zchr9\_26Coverage  
699.Zchr9\_26Tags  
700.Zchr9\_27Changes  
701.Zchr9\_27Coverage  
702.Zchr9\_27Tags  
703.Zchr9\_28Changes  
704.Zchr9\_28Coverage  
705.Zchr9\_28Tags  
706.Zchr9\_29Changes  
707.Zchr9\_29Coverage



708.Zchr9\_29Tags  
709.Zchr9\_2Changes  
710.Zchr9\_2Coverage  
711.Zchr9\_2Tags  
712.Zchr9\_30Changes  
713.Zchr9\_30Coverage  
714.Zchr9\_30Tags  
715.Zchr9\_31Changes  
716.Zchr9\_31Coverage  
717.Zchr9\_31Tags  
718.Zchr9\_32Changes  
719.Zchr9\_32Coverage  
720.Zchr9\_32Tags  
721.Zchr9\_33Changes  
722.Zchr9\_33Coverage  
723.Zchr9\_33Tags  
724.Zchr9\_34Changes  
725.Zchr9\_34Coverage  
726.Zchr9\_34Tags  
727.Zchr9\_35Changes  
728.Zchr9\_35Coverage  
729.Zchr9\_35Tags  
730.Zchr9\_36Changes  
731.Zchr9\_36Coverage  
732.Zchr9\_36Tags  
733.Zchr9\_37Changes  
734.Zchr9\_37Coverage  
735.Zchr9\_37Tags  
736.Zchr9\_38Changes  
737.Zchr9\_38Coverage  
738.Zchr9\_38Tags  
739.Zchr9\_39Changes  
740.Zchr9\_39Coverage  
741.Zchr9\_39Tags  
742.Zchr9\_3Changes  
743.Zchr9\_3Coverage  
744.Zchr9\_3Tags  
745.Zchr9\_4Changes  
746.Zchr9\_4Coverage  
747.Zchr9\_4Tags  
748.Zchr9\_5Changes  
749.Zchr9\_5Coverage  
750.Zchr9\_5Tags  
751.Zchr9\_6Changes  
752.Zchr9\_6Coverage  
753.Zchr9\_6Tags  
754.Zchr9\_7Changes  
755.Zchr9\_7Coverage  
756.Zchr9\_7Tags  
757.Zchr9\_8Changes  
758.Zchr9\_8Coverage  
759.Zchr9\_8Tags  
760.Zchr9\_9Changes  
761.Zchr9\_9Coverage  
762.Zchr9\_9Tags  
763.ZchrM\_1Changes  
764.ZchrM\_1Coverage  
765.ZchrM\_1Tags  
766.ZchrX\_10Changes  
767.ZchrX\_10Coverage  
768.ZchrX\_10Tags  
769.ZchrX\_11Changes

770.ZchrX\_11Coverage  
771.ZchrX\_11Tags  
772.ZchrX\_12Changes  
773.ZchrX\_12Coverage  
774.ZchrX\_12Tags  
775.ZchrX\_13Changes  
776.ZchrX\_13Coverage  
777.ZchrX\_13Tags  
778.ZchrX\_14Changes  
779.ZchrX\_14Coverage  
780.ZchrX\_14Tags  
781.ZchrX\_15Changes  
782.ZchrX\_15Coverage  
783.ZchrX\_15Tags  
784.ZchrX\_16Changes  
785.ZchrX\_16Coverage  
786.ZchrX\_16Tags  
787.ZchrX\_17Changes  
788.ZchrX\_17Coverage  
789.ZchrX\_17Tags  
790.ZchrX\_18Changes  
791.ZchrX\_18Coverage  
792.ZchrX\_18Tags  
793.ZchrX\_19Changes  
794.ZchrX\_19Coverage  
795.ZchrX\_19Tags  
796.ZchrX\_1Changes  
797.ZchrX\_1Coverage  
798.ZchrX\_1Tags  
799.ZchrX\_20Changes  
800.ZchrX\_20Coverage  
801.ZchrX\_20Tags  
802.ZchrX\_21Changes  
803.ZchrX\_21Coverage  
804.ZchrX\_21Tags  
805.ZchrX\_22Changes  
806.ZchrX\_22Coverage  
807.ZchrX\_22Tags  
808.ZchrX\_2Changes  
809.ZchrX\_2Coverage  
810.ZchrX\_2Tags  
811.ZchrX\_3Changes  
812.ZchrX\_3Coverage  
813.ZchrX\_3Tags  
814.ZchrX\_4Changes  
815.ZchrX\_4Coverage  
816.ZchrX\_4Tags  
817.ZchrX\_5Changes  
818.ZchrX\_5Coverage  
819.ZchrX\_5Tags  
820.ZchrX\_6Changes  
821.ZchrX\_6Coverage  
822.ZchrX\_6Tags  
823.ZchrX\_7Changes  
824.ZchrX\_7Coverage  
825.ZchrX\_7Tags  
826.ZchrX\_8Changes  
827.ZchrX\_8Coverage  
828.ZchrX\_8Tags  
829.ZchrX\_9Changes  
830.ZchrX\_9Coverage  
831.ZchrX\_9Tags

832.ZchrY\_10Changes  
833.ZchrY\_10Coverage  
834.ZchrY\_10Tags  
835.ZchrY\_11Changes  
836.ZchrY\_11Coverage  
837.ZchrY\_11Tags  
838.ZchrY\_12Changes  
839.ZchrY\_12Coverage  
840.ZchrY\_12Tags  
841.ZchrY\_13Changes  
842.ZchrY\_13Coverage  
843.ZchrY\_13Tags  
844.ZchrY\_14Changes  
845.ZchrY\_14Coverage  
846.ZchrY\_14Tags  
847.ZchrY\_15Changes  
848.ZchrY\_15Coverage  
849.ZchrY\_15Tags  
850.ZchrY\_16Changes  
851.ZchrY\_16Coverage  
852.ZchrY\_16Tags  
853.ZchrY\_17Changes  
854.ZchrY\_17Coverage  
855.ZchrY\_17Tags  
856.ZchrY\_1Changes  
857.ZchrY\_1Coverage  
858.ZchrY\_1Tags  
859.ZchrY\_2Changes  
860.ZchrY\_2Coverage  
861.ZchrY\_2Tags  
862.ZchrY\_3Changes  
863.ZchrY\_3Coverage  
864.ZchrY\_3Tags  
865.ZchrY\_4Changes  
866.ZchrY\_4Coverage  
867.ZchrY\_4Tags  
868.ZchrY\_5Changes  
869.ZchrY\_5Coverage  
870.ZchrY\_5Tags  
871.ZchrY\_6Changes  
872.ZchrY\_6Coverage  
873.ZchrY\_6Tags  
874.ZchrY\_7Changes  
875.ZchrY\_7Coverage  
876.ZchrY\_7Tags  
877.ZchrY\_8Changes  
878.ZchrY\_8Coverage  
879.ZchrY\_8Tags  
880.ZchrY\_9Changes  
881.ZchrY\_9Coverage  
882.ZchrY\_9Tags  
883.ZNMChanges  
884.ZNMCoverage  
885.ZNMTags

Below we describe the following tables from the output above:

- (1) Consolidated Changes
- (2) Zchr\*\_ \*Changes
- (3) Zchr\*\_ \*Coverage
- (4) Zchr\*\_ \*Tags

(1) ConsolidatedChanges- summarizes all variants called

| Column header       | Example value                        |
|---------------------|--------------------------------------|
| UID                 | 59173F25-9FFE-42B6-96F7-0006CF05D366 |
| IndexString         | 0                                    |
| Coverage            | 8                                    |
| MutCount            | 8                                    |
| ACount              | 0                                    |
| CCount              | 0                                    |
| GCount              | 0                                    |
| TCount              | 8                                    |
| SumQualityScore     | 311                                  |
| MinQualityScore     | 30                                   |
| MaxQualityScore     | 41                                   |
| AverageQualityScore | 38                                   |
| Forward             | 3                                    |
| Reverse             | 5                                    |
| DistinctCoverage    | 2                                    |
| DistinctTags        | 2                                    |
| DistinctPairs       | 2                                    |
| MutType             | Homo-SBS                             |
| Chrom               | chr4                                 |
| Start               | 181198628                            |
| End                 | 181198628                            |
| BaseFrom            | C                                    |
| BaseTo              | T                                    |
| Transcript          | NULL                                 |
| TxChangeStart       | NULL                                 |
| TxChangeEnd         | NULL                                 |
| TxBaseFrom          | NULL                                 |
| TxBaseTo            | NULL                                 |
| AminoStart          | NULL                                 |
| AminoEnd            | NULL                                 |
| AAFrom              | NULL                                 |
| AATo                | NULL                                 |
| SNP                 | rs2309255                            |
| Deleted             | 1                                    |
| Comment             | NULL                                 |

(2) Zchr\*\_Changes

| Column header | Example value                  |
|---------------|--------------------------------|
| ClusterID     | 0_HISEQ_150_2_2109_10547_89283 |
| IndexString   | 0                              |
| ReadNumber    | 1                              |
| Cycle         | 34                             |

|                     |                            |
|---------------------|----------------------------|
| Filtered            | Y                          |
| TotalMutationsInTag | 1                          |
| QualityScore        | 9                          |
| MutType             | SBS                        |
| Chrom               | chr1                       |
| MatchOrientation    | F                          |
| Start               | 29401957                   |
| End                 | 29401957                   |
| BaseFrom            | T                          |
| BaseTo              | A                          |
| Deleted             | 1                          |
| PairCoordinates     | chr1F29401924chr1R29402354 |

(3) Zchr\*\_\*Coverage

| Column header             | Example value |
|---------------------------|---------------|
| IndexString               | 0             |
| Position                  | 17185422      |
| RawCoverage               | 13            |
| PhredCoverage             | 11            |
| EffectiveCoverage         | 0.994141      |
| DistinctRawCoverage       | 2             |
| DistinctPhredCoverage     | 2             |
| DistinctEffectiveCoverage | 0.25          |

(4) Zchr\*\_\*Tags

| Column        | Example value                                                       |
|---------------|---------------------------------------------------------------------|
| ClusterID     | 0_HISEQ_150_2_2109_10045_85816                                      |
| IndexString   | 0                                                                   |
| ReadNumber    | 1                                                                   |
| Sequence      | CCCACCACCACACCCAGTTAATTTTTGTATTTTTAGTAGAGGCAG                       |
| Quality       | _____eeeegggfeffgffhghfhhihhhhfhiihihhfhfefdgfi\_e`fcbbb\db^`dddeec |
| Match         | chr1.fa                                                             |
| Chrom         | chr1                                                                |
| MatchOrientat | F                                                                   |
| LeftPosition  | 22162961                                                            |
| RightPosition | 22163060                                                            |
| MatchContig   | NULL                                                                |
| MatchDescript | 100                                                                 |
| MinQS         | 7                                                                   |
| MaxQS         | 41                                                                  |
| AverageQS     | 35                                                                  |
| TotalMuations | 0                                                                   |
| AlignmentSco  | 11                                                                  |
| PairedEndRe   | 888                                                                 |
| PartnerChrom  | NULL                                                                |

|               |                            |
|---------------|----------------------------|
| PartnerContig | NULL                       |
| PartnerOffset | 314                        |
| PartnerOrient | R                          |
| Filtered      | Y                          |
| Exclude       | 0                          |
| PairCoordinat | chr1F22162961chr1R22163275 |

#### 4 Organize data into change and molecule table with Watson and Crick family counts

The goal of this section is to use the data structure detailed above to reorganize the data into two tables per BOT library: changes and molecules. The outputs of QUERY 1 were two intermediate tables that are the input to QUERY 2. The outputs of QUERY 2 were the final tables with example names as follows:

**Final molecule output of QUERY 2** (molecules table):

*NgsNCS\_Brain01NormalP30MM6F5Genome100D031615\_SupermutantMoleculesSummaryFinal\_022213v6*

**Final changes output of QUERY 2** (changes table):

*NgsNCS\_Brain01NormalP30MM6F5Genome100D031615\_SuperMutantsSummaryFinal\_022213v6*

Below are Query 1 and Query 2. After the queries, examples of the **Final molecules output of QUERY 2** and **Final changes output of QUERY 2** are given.

#### QUERY 1

```
declare
@SQL varchar(8000),
@ChromSub varchar(50),
@exp varchar(255),
@dbTo varchar(255),
@serverFrom varchar(255),
@Version varchar(255),
@TagMutationsMax tinyint,
@TagLen_i int,
@TagLen_s varchar(3),
@Trim tinyint,
@lowlim_search varchar(3),
@maxgap varchar(3),
@lowlim_total varchar(3)

set @serverFrom = 'LUDSEQ7'
set @exp = 'NgsNCS_Brain09NormalP30MM6F5Genome100D031615'
set @dbTo = '[MH_Nonclonal_NCS]'
set @Version='022213v6'
```

```

set @TagMutationsMax = 5 -- Maximum number of mutations in both tags,
inclusive
set @TagLen_i = 100 -- Length of tag (integer)
set @TagLen_s = 100 -- Length of tag (string)
set @Trim = 5 -- Number of bases on each end of tag that must be perfect,
inclusive

set @lowlim_search = 2
set @maxgap = 1
set @lowlim_total = 8

create table #TempTag (
    [ClusterID] [varchar](250) not null,
    [IndexString] [varchar](25) null,
    [ReadNumber] [tinyint] not null,
    [Sequence] [varchar](100) null,
    [Quality] [varchar](100) null,
    [Match] [varchar](50) null,
    [Chrom] [varchar](50) null,
    [MatchOrientation] [varchar](1) null,
    [LeftPosition] [int] null,
    [RightPosition] [int] null,
    [MatchContig] [varchar](150) null,
    [MatchDescription] [varchar](150) null,
    [MinQS] [tinyint] null,
    [MaxQS] [tinyint] null,
    [AverageQS] [tinyint] null,
    [TotalMutationsInTag] [tinyint] null,
    [AlignmentScore] [int] null,
    [PairedEndReadAligmentScore] [int] null,
    [PartnerChrom] [varchar](150) null,
    [PartnerContig] [varchar](150) null,
    [PartnerOffset] [int] null,
    [PartnerOrientation] [char](1) null,
    [Filtered] [char](1) null,
    [Exclude] [bit] null,
    [PairCoordinates] [varchar](120) null,
    [GenePair] [varchar](50)
)

create table #TempChanges (
    [ClusterID] [varchar](250) not null,
    [IndexString] [varchar](25) null,
    [ReadNumber] [tinyint] not null,
    [Cycle] [tinyint] not null,
    [Filtered] [char](1) null,
    [TotalMutationsInTag] [tinyint] null,
    [QualityScore] [tinyint] null,
    [MutType] [varchar](25) null,
    [Chrom] [varchar](50) null,
    [MatchOrientation] [char](1) null,
    [Start] [int] null,
    [end] [int] null,
    [BaseFrom] [varchar](60) null,
    [BaseTo] [varchar](60) null,
    [Deleted] [bit] null,
    [PairCoordinates] [varchar](120) null
)

```

```

)

create table #TempTagsChangesInDels (
  [ClusterID] [varchar](250) not null,
  [ReadNumber] [tinyint] not null,
  [Sequence] [varchar](100) null,
  [Quality] [varchar](100) null,
  [Match] [varchar](50) null,
  [Chrom] [varchar](50) null,
  [MatchOrientation] [varchar](1) null,
  [LeftPosition] [int] null,
  [RightPosition] [int] null,
  [MinQS] [tinyint] null,
  [MaxQS] [tinyint] null,
  [AverageQS] [tinyint] null,
  [TotalMutationsInTag] [tinyint] null,
  [AlignmentScore] [int] null,
  [PairedEndReadAlignmentScore] [int] null,
  [PartnerChrom] [varchar](150) null,
  [PartnerOrientation] [char](1) null,
  [Filtered] [char](1) null,
  [Exclude] [bit] null,
  [PairCoordinates] [varchar](120) null,
  [GenePair] [varchar](50) null,

  [Cycle] [tinyint] not null,
  [QualityScore] [tinyint] null,
  [MutType] [varchar](25) null,
  [Start] [int] null,
  [end] [int] null,
  [BaseFrom] [varchar](60) null,
  [BaseTo] [varchar](60) null,
  [Deleted] [bit] null,

  [HomoPolymerString] [varchar](100) null
)

create table #TempChangesWithHT (
  [ClusterID] [varchar](250) not null,
  [IndexString] [varchar](25) null,
  [ReadNumber] [tinyint] not null,
  [Cycle] [tinyint] not null,
  [Filtered] [char](1) null,
  [TotalMutationsInTag] [tinyint] null,
  [QualityScore] [tinyint] null,
  [MutType] [varchar](25) null,
  [Chrom] [varchar](50) null,
  [MatchOrientation] [char](1) null,
  [Start] [int] null,
  [end] [int] null,
  [BaseFrom] [varchar](60) null,
  [BaseTo] [varchar](60) null,
  [Deleted] [bit] null,
  [PairCoordinates] [varchar](120) null,

  [HomoPolymerString] [varchar](100) null
)

```



```

create table #TempMoleculesTable (
    [ClusterID] [varchar](250) not null,
    [ReadNumber] [tinyint] not null,
    [PairCoordinates] [varchar](120) null,
)

create table #TempMoleculesSummaryTable (
    [PairCoordinates] [varchar](120) null,
    [ForRead1] [int] not null,
    [ForRead2] [int] not null,
    [TotalCount] [int]
)

set @SQL = 'create table
'+@dbTo+'.dbo.['+@exp+'_SupermutantMoleculesSummary'+@Version+]' '

set @SQL = @SQL+'([PairCoordinates] [varchar](120) null, ForRead1 [int] not
null, ForRead2 [int] not null, TotalCount [int]) '
exec(@SQL)

set @SQL = 'create table
'+@dbTo+'.dbo.['+@exp+'_SuperMutantsSummary'+@Version+]' '
set @SQL = @SQL+'([PairCoordinates] [varchar](120) null, [Chrom] [varchar](50)
null, [Start] [int] null, [end] [int] null, '
set @SQL = @SQL+'[BaseFrom] [varchar](60) null, [BaseTo] [varchar](60) null,
[Cycle] [tinyint] not null, [MatchOrientation] [char](1) null, [InHT]
[CHAR](1) null, '
set @SQL = @SQL+'[AverageQualityScore] [int] null, [MutRead1] [int] null,
[MutRead2] [int] null, [ForRead1s] [int] null, [ForRead2s] [int] null,
[TotalMutCount] [int] null ) '
exec(@SQL)

declare mycursor cursor forward_only for
select [ChromosomeSub] from [LudwigMasterGenes].[dbo].[Genome_hg19cForGenome]
order by [Chromosome], [CutOn]

open mycursor

fetch next from mycursor into @ChromSub

while @@fetch_status = 0
begin

set @SQL= '
insert into #TempTag
select *
from '+@serverFrom+'.['+@exp+'].[dbo].[Z'+@ChromSub+'Tags]
'
exec(@SQL)
update #TempTag set [ClusterID] = substring([ClusterID],3,len(ClusterID)-2)

set @SQL='
insert into #TempChanges
select *
from '+@serverFrom+'.['+@exp+'].dbo.[Z'+@ChromSub+'Changes]
'

```

```

exec (@SQL)
update #TempChanges set [ClusterID] = substring([ClusterID],3,len(ClusterID)-
2)

insert into #TempTagsChangesInDels (
    [ClusterID],
    [ReadNumber],
    [Sequence],
    [Quality],
    [Match],
    [Chrom],
    [MatchOrientation],
    [LeftPosition],
    [RightPosition],
    [MinQS],
    [MaxQS],
    [AverageQS],
    [TotalMutationsInTag],
    [AlignmentScore],
    [PairedEndReadAligmentScore],
    [PartnerChrom],
    [PartnerOrientation],
    [Filtered],
    [Exclude],
    [PairCoordinates],
    [GenePair],
    [Cycle],
    [QualityScore],
    [MutType],
    [Start],
    [end],
    [BaseFrom],
    [BaseTo],
    [Deleted]
)
select
    a.[ClusterID],
    a.[ReadNumber],
    a.[Sequence],
    a.[Quality],
    a.[Match],
    a.[Chrom],
    a.[MatchOrientation],
    a.[LeftPosition],
    a.[RightPosition],
    a.[MinQS],
    a.[MaxQS],
    a.[AverageQS],
    a.[TotalMutationsInTag],
    a.[AlignmentScore],
    a.[PairedEndReadAligmentScore],
    a.[PartnerChrom],
    a.[PartnerOrientation],
    a.[Filtered],
    a.[Exclude],
    a.[PairCoordinates],
    a.[GenePair],

```

```

        b.[Cycle],
        b.[QualityScore],
        b.[MutType],
        b.[Start],
        b.[end],
        b.[BaseFrom],
        b.[BaseTo],
        b.[Deleted]

from #TempTag a inner join #TempChanges b
on a.[ClusterID] = b.[ClusterID] AND a.[ReadNumber] = b.[ReadNumber]
where b.[MutType] = 'INS' OR b.[MutType] = 'DEL'

set @SQL = '
    use '+@dbTo+'
    update #TempTagsChangesInDels
    set [HomoPolymerString] = dbo.HomopolymerTractPosforSBS( [Sequence],
'+@lowlim_search+', '+@maxgap+', '+@lowlim_total+' )
    where [MutType] = 'INS' or [MutType] = 'DEL'
'
exec(@SQL)

insert into #TempChangesWithHT
select
    a.[ClusterID],
    a.[IndexString],
    a.[ReadNumber],
    a.[Cycle],
    a.[Filtered],
    a.[TotalMutationsInTag],
    a.[QualityScore],
    a.[MutType],
    a.[Chrom],
    a.[MatchOrientation],
    a.[Start],
    a.[end],
    a.[BaseFrom],
    a.[BaseTo],
    a.[Deleted],
    a.[PairCoordinates],
    b.[HomoPolymerString]
from #TempChanges a left outer join #TempTagsChangesInDels b
on a.[ClusterID] = b.[ClusterID] AND a.[ReadNumber] = b.[ReadNumber] AND
a.[Cycle] = b.[Cycle]

insert into #TempMoleculesTable
select
    FR.[ClusterID],
    FR.[ReadNumber],
    FR.[PairCoordinates]
from #TempTag FR
inner join #TempTag RR on FR.[ClusterID]=RR.[ClusterID] and FR.ReadNumber !=
RR.ReadNumber
left join #TempChanges C on C.ClusterID=FR.ClusterID and (C.Cycle <=@Trim or
C.Cycle >(@TagLen_i-@Trim))
where FR.MatchOrientation='F' and FR.PartnerOrientation = 'R' and
FR.[PartnerChrom] is null

```

```

and FR.Exclude=0 and RR.Exclude=0 and
FR.TotalMutationsInTag<=@TagMutationsMax and
RR.TotalMutationsInTag<=@TagMutationsMax and C.ClusterID is null and
(RR.RightPosition-FR.LeftPosition)>(@TagLen_i*2-2)

insert into #TempMoleculesSummaryTable
select [PairCoordinates],
       sum(case ReadNumber when 1 then 1 else 0 end) as ForRead1,
/*!*/ sum(case ReadNumber when 2 then 1 else 0 end) as ForRead2,
       count(*) as TotalCount
from #TempMoleculesTable
group by [PairCoordinates]

set @SQL = 'insert into
'+@dbTo+'.dbo.['+@exp+'_SupermutantMoleculesSummary'+@Version+'] '
set @SQL = @SQL+'select * from #TempMoleculesSummaryTable '
exec(@SQL)

set @SQL = '
insert into '+@dbTo+'.dbo.['+@exp+'_SuperMutantsSummary'+@Version+']
select
       C2.PairCoordinates,
       C2.Chrom,
       C2.Start,
       C2.[end],
       C2.BaseFrom,
       C2.BaseTo,
       C2.Cycle,
       C2.MatchOrientation,
case
when ((C2.[MutType] = 'INS' OR C2.[MutType] = 'DEL')) AND
C2.[MatchOrientation] = 'F' AND substring(C2.[HomoPolymerString], C2.Cycle,
1) = 'X') then 'Y'
when ((C2.[MutType] = 'INS' OR C2.[MutType] = 'DEL')) AND
C2.[MatchOrientation] = 'R' AND substring(C2.[HomoPolymerString],
(''+@TagLen_s+'-C2.Cycle)+1, 1) = 'X') then 'Y'
else 'N'
end as InHT,
       sum(C2.QualityScore)/count(*) as AverageQualityScore,
       sum(case C2.ReadNumber when 1 then 1 else 0 end) as MutRead1,
/*!*/ sum(case C2.ReadNumber when 2 then 1 else 0 end) as MutRead2,
       Min(MS.ForRead1) as ForRead1s,
       Min(MS.ForRead2) as ForRead2s,
       count(*) as TotalMutCount
from #TempChangesWithHT C2 inner join #TempMoleculesTable M
on M.ClusterID=C2.ClusterID and C2.MatchOrientation='F' inner join
#TempMoleculesSummaryTable MS on MS.PairCoordinates=C2.PairCoordinates
group by
C2.PairCoordinates, C2.Chrom, C2.Start, C2.[end], C2.BaseFrom, C2.BaseTo,
C2.MutType, C2.Cycle, C2.MatchOrientation, C2.[HomoPolymerString]
order by C2.Chrom, C2.Start, C2.[end], C2.BaseFrom, C2.BaseTo, C2.Cycle,
C2.MatchOrientation, C2.PairCoordinates
'
exec(@SQL)

set @SQL = '
insert into '+@dbTo+'.dbo.['+@exp+'_SuperMutantsSummary'+@Version+']

```

```

select
C2.PairCoordinates, C2.Chrom, C2.Start, C2.[end], C2.BaseFrom, C2.BaseTo,
C2.Cycle, C2.MatchOrientation,
case
when ((C2.[MutType] = 'INS' OR C2.[MutType] = 'DEL') AND
C2.[MatchOrientation] = 'F' AND substring(C2.[HomoPolymerString], C2.Cycle,
1) = 'X') then 'Y'
when ((C2.[MutType] = 'INS' OR C2.[MutType] = 'DEL') AND
C2.[MatchOrientation] = 'R' AND substring(C2.[HomoPolymerString],
('+@TagLen_s+'-C2.Cycle)+1, 1) = 'X') then 'Y'
else 'N'
end as InHT,
sum(C2.QualityScore)/count(*) as AverageQualityScore,
sum(case C2.ReadNumber when 1 then 1 else 0 end) as MutRead1,
/*!*/ sum(case C2.ReadNumber when 2 then 1 else 0 end) as MutRead2,
Min(MS.ForRead2) as ForRead1s,
Min(MS.ForRead1) as ForRead2s,
count(*) as TotalMutCount
from #TempChangesWithHT C2 inner join #TempMoleculesTable M
on M.ClusterID=C2.ClusterID and C2.MatchOrientation='R' inner join
#TempMoleculesSummaryTable MS
on MS.PairCoordinates=C2.PairCoordinates
group by
C2.PairCoordinates, C2.Chrom, C2.Start, C2.[end], C2.BaseFrom, C2.BaseTo,
C2.MutType, C2.Cycle, C2.MatchOrientation, C2.[HomoPolymerString]
order by C2.Chrom, C2.Start, C2.[end], C2.BaseFrom, C2.BaseTo, C2.Cycle,
C2.MatchOrientation, C2.PairCoordinates
'
exec (@SQL)

delete from #TempTag
delete from #TempChanges
delete from #TempTagsChangesInDels
delete from #TempChangesWithHT
delete from #TempMoleculesTable
delete from #TempMoleculesSummaryTable

fetch next from mycursor into @ChromSub
end

close mycursor
deallocate mycursor

drop table #TempTag
drop table #TempChanges
drop table #TempMoleculesTable
drop table #TempMoleculesSummaryTable
drop table #TempTagsChangesInDels
drop table #TempChangesWithHT

----Remove NULLs from SuperMutantsSummary table (InDels)
set @SQL = '
update '+@dbTo+'.dbo.'+'@exp+'_SuperMutantsSummary'+@Version+'
set
    BaseFrom = isnull(BaseFrom, ''),
    BaseTo = isnull(BaseTo, '')

```

```
'  
exec (@SQL)
```

## QUERY 2

```
declare  
@SQL varchar(8000),  
@chromSub varchar(50),  
@exp varchar(255),  
@dbData varchar(255),  
@dbFilter varchar(255),  
@tableBins varchar(255),  
@tableStructVars varchar(255),  
@tableIntRepeats varchar(255),  
@tableRM varchar(255),  
@tableSimRepeats varchar(255),  
@tableSuperDups varchar(255),  
@version varchar(255),  
@tagLen varchar(3)  
  
set @exp = 'NgsNCS_Brain09NormalP30MM6F5Genome100D031615'  
set @dbData = '[MH_NonClonal_NCS]'  
set @dbFilter = '[MH_Filtering]'  
set @tableBins = '[hg18_RepDNA_Bins_Master]'  
set @tableStructVars = '[hg19__RepDNA_dgvMerged_042814]'  
set @tableIntRepeats = '[hg19__RepDNA_nestedRepeats_042814]'  
set @tableRM = '[hg19__RepDNA_rmsk_042814]'  
set @tableSimRepeats = '[hg19__RepDNA_simpleRepeat_042814]'  
set @tableSuperDups = '[hg19__RepDNA_genomicSuperDups_042814]'  
set @version='022213v6'  
set @tagLen = '100'  
--MH revision 5/8/14: imported hg19 repetitive tables and replaced old hg18  
files above  
  
--Calculate Molecule Span for Filtering  
set @SQL = 'alter table  
' + @dbData + '.dbo.[' + @exp + '_SupermutantMoleculesSummary' + @version + ']  
    add  
        chrom varchar(50),  
        MoleculeLeft int,  
        MoleculeRight int  
,  
exec (@SQL)  
  
set @SQL = 'update ' + @dbData + '.dbo.[' + @exp + '_SupermutantMoleculesSummary' +  
@version + ']  
    set  
    chrom =  
        substring(PairCoordinates,1,charindex( 'F', PairCoordinates  
collate Latin1_General_CS_AS ) - 1),  
    MoleculeLeft =  
        substring(PairCoordinates,charindex( 'F', PairCoordinates  
collate Latin1_General_CS_AS ) + 1, charindex( 'c',  
PairCoordinates collate Latin1_General_CS_AS, 2) -
```

```

        charindex( 'F', PairCoordinates collate Latin1_General_CS_AS )
        - 1), --note: 1-based start
    MoleculeRight =
        substring(PairCoordinates,charindex( 'R', PairCoordinates
        collate Latin1_General_CS_AS ) + 1 ,( len(PairCoordinates) -
        charindex( 'R', PairCoordinates collate
        Latin1_General_CS_AS ) ) + '@tagLen+' - 1 -- note: 1-based end
    ,
exec(@SQL)

--Assign Bins to Molecules
set @SQL = '
create table '+@dbData+'.dbo.['+@exp+'_SupermutantMoleculesSummaryFinal_'+
@version +' ] (
    [PairCoordinates] [varchar](120) null, [ForRead1] [int] not null,
    [ForRead2] [int] not null, [TotalCount] [int], [chrom] [varchar](50) not null,
    [MoleculeLeft] [int] not null, [MoleculeRight] [int] not null, [#bin] bigint
    null
)
'
exec(@SQL)

set @SQL = '
insert into '+@dbData+'.dbo.['+@exp+'_SupermutantMoleculesSummaryFinal_'+
@version +' ]
select
    a.[PairCoordinates],
    a.[ForRead1],
    a.[ForRead2],
    a.[TotalCount],
    a.[chrom],
    a.[MoleculeLeft],
    a.[MoleculeRight],
    b.[#bin]

from '+@dbData+'.dbo.['+@exp+'_SupermutantMoleculesSummary'+ @version +' ] a
    left outer join '+@dbFilter+'.dbo.['+@tableBins+' b
on a.chrom = b.chrom
    and(a.MoleculeLeft between b.#bin_MIN + 1 and b.#bin_MAX and
    a.MoleculeRight between b.#bin_MIN + 1 and b.#bin_MAX
)
'
exec(@SQL)

--Begin Filtering
set @SQL = ' alter table
'+@dbData+'.dbo.['+@exp+'_SupermutantMoleculesSummaryFinal_'+ @version +' ]
add RepDNA varchar(25) ' exec(@SQL)

--Filter Molecules that DON'T have a bin
set @SQL = '
update SM
set SM.RepDNA =
case
-- Filter against Segmental Duplications (SuperDups)
when exists (
    select *

```

```

from '+@dbFilter+'.dbo.'+@tableSuperDups+' SD
where (
    SM.chrom = SD.chrom
    and SM.MoleculeLeft between SD.chromStart + 1 and SD.chromEnd
) or (
    SM.chrom = SD.otherchrom
    and SM.MoleculeLeft between SD.otherStart + 1 and SD.otherEnd
) or (
    SM.chrom = SD.chrom
    and SM.MoleculeRight between SD.chromStart + 1 and SD.chromEnd
) or (
    SM.chrom = SD.otherchrom
    and SM.MoleculeRight between SD.otherStart + 1 and SD.otherEnd
)
) then 'SuperDup'

--Exclude Copy Number variants
when exists(
    select *
    from '+@dbFilter+'.dbo.'+@tableStructVars+' CN
    where (
        SM.chrom = CN.chrom
        and (
            (SM.MoleculeLeft between CN.chromStart + 1 and CN.chromEnd)
            or (SM.MoleculeRight between CN.chromStart + 1 and CN.chromEnd)
        )
        and CN.varType = 'CopyNumber'
    )
    ) then 'StructVar'

--Exclude interrupted Repeats
when exists(
    select *
    from '+@dbFilter+'.dbo.'+@tableIntRepeats+' IR
    where (
        SM.chrom = IR.chrom
        and (
            (SM.MoleculeLeft between IR.chromStart + 1 and IR.chromEnd)
            or
            (SM.MoleculeRight between IR.chromStart + 1 and IR.chromEnd)
        )
    )
    ) then 'InterruptedRepeat'

--Exclude Simple Repeats
when exists(
    select *
    from '+@dbFilter+'.dbo.'+@tableSimRepeats+' SR
    where (
        SM.chrom = SR.chrom
        and (
            (SM.MoleculeLeft between SR.chromStart + 1 and SR.chromEnd)
            or
            (SM.MoleculeRight between SR.chromStart + 1 and SR.chromEnd)
        )
    )
    ) then 'SimpleRepeat'

```



```

-- Filter against Repeat Masker 3.27
when exists (
  select *
  from '+@dbFilter+'.dbo.'+@tableRM+' RM
  where
    SM.chrom = RM.genoName
    and (
      (SM.MoleculeLeft between RM.genoStart + 1 and RM.genoEnd)
      or
      (SM.MoleculeRight between RM.genoStart + 1 and RM.genoEnd)
    )
    ) then 'RM327'

else 'Unique'
end
from '+@dbData+'.dbo.['+@exp+'_SupermutantMoleculesSummaryFinal_'+ @version
+'] SM
where SM.[#bin] is null
'
exec (@SQL)

--Filter Molecules that DO have an assigned bin
set @SQL = '
update SM
set SM.RepDNA =
case
-- Filter against Segmental Duplications (SuperDups)
  when exists (
    select *
    from '+@dbFilter+'.dbo.'+@tableSuperDups+' SD
    where SM.[#bin] = SD.[#bin] and (
      SM.chrom = SD.chrom
      and SM.MoleculeLeft between SD.chromStart + 1 and SD.chromEnd
    ) or (
      SM.chrom = SD.otherchrom
      and SM.MoleculeLeft between SD.otherStart + 1 and SD.otherEnd
    ) or (
      SM.chrom = SD.chrom
      and SM.MoleculeRight between SD.chromStart + 1 and SD.chromEnd
    ) or (
      SM.chrom = SD.otherchrom
      and SM.MoleculeRight between SD.otherStart + 1 and SD.otherEnd
    )
    ) then 'SuperDup'

--Exclude Copy Number variants
  when exists(
    select *
    from '+@dbFilter+'.dbo.'+@tableStructVars+' CN
    where SM.[#bin] = CN.[#bin] and (
      SM.chrom = CN.chrom
      and (
        (SM.MoleculeLeft between CN.chromStart + 1 and CN.chromEnd)
        or
        (SM.MoleculeRight between CN.chromStart + 1 and CN.chromEnd)
      )
    )
  )

```

```

        and CN.varType = 'CopyNumber'
    )
    ) then 'StructVar'

--Exclude interrupted Repeats
when exists(
select *
from '+@dbFilter+'.dbo.'+@tableIntRepeats+' IR
where SM.[#bin] = IR.[#bin] and (
    SM.chrom = IR.chrom
    and (
        (SM.MoleculeLeft between IR.chromStart + 1 and IR.chromEnd)
        or
        (SM.MoleculeRight between IR.chromStart + 1 and IR.chromEnd)
    )
)
) then 'InterruptedRepeat'

--Exclude Simple Repeats
when exists(
select *
from '+@dbFilter+'.dbo.'+@tableSimRepeats+' SR
where SM.[#bin] = SR.[#bin] and (
    SM.chrom = SR.chrom
    and (
        (SM.MoleculeLeft between SR.chromStart + 1 and SR.chromEnd)
        or
        (SM.MoleculeRight between SR.chromStart + 1 and SR.chromEnd)
    )
)
) then 'SimpleRepeat'

-- Filter against Repeat Masker 3.27
when exists (
select *
from '+@dbFilter+'.dbo.'+@tableRM+' RM
where SM.[#bin] = RM.[#bin] and (
    SM.chrom = RM.genoName
    and (
        (SM.MoleculeLeft between RM.genoStart + 1 and RM.genoEnd)
        or
        (SM.MoleculeRight between RM.genoStart + 1 and RM.genoEnd)
    )
)
) then 'RM327'

else 'Unique'
end
from '+@dbData+'.dbo.'+@exp+'_SupermutantMoleculesSummaryFinal_'+ @version
+') SM
where SM.[#bin] is not null
'
exec (@SQL)

--add RepDNA filtering info to SuperMutantsSummary table
set @SQL = '

```

```

create table '+@dbData+'.dbo.['+@exp+'_SuperMutantsSummaryFinal_'+ @version
+'] (
    [PairCoordinates] varchar(250), [RepDNA] varchar(25), [chrom]
varchar(50), [Start] int, [end] int, [BaseFrom] varchar(60), [Baseto]
varchar(60), [Cycle] TINYint, [MatchOrientation] varchar(1), [InHT]
[CHAR](1), [AverageQualityScore] TINYint, [MutRead1] int, [MutRead2] int,
[ForRead1s] int, [ForRead2s] int, [TotalMutCount] int
)
'
exec (@SQL)

set @SQL = '
insert into '+@dbData+'.dbo.['+@exp+'_SuperMutantsSummaryFinal_'+ @version +']
select
    a.[PairCoordinates], b.[RepDNA], a.[chrom], a.[Start], a.[end],
    a.[BaseFrom], a.[Baseto], a.[Cycle], a.[MatchOrientation],
    a.[InHT], a.[AverageQualityScore], a.[MutRead1], a.[MutRead2],
    a.[ForRead1s], a.[ForRead2s], a.[TotalMutCount]
from '+@dbData+'.dbo.['+@exp+'_SuperMutantsSummary'+ @version +'] a
left outer join (
--Subquery below prevents duplicating rows when two molecules share the same
pair coordinates
    select c.PairCoordinates, c.RepDNA
    from '+@dbData+'.dbo.['+@exp+'_SupermutantMoleculesSummaryFinal_'+
@version +'] c
    group by c.PairCoordinates, c.RepDNA
) b
on a.[PairCoordinates] = b.[PairCoordinates]
'
exec (@SQL)

```

### Final molecule output of QUERY 2

| Column header   | Description                                                                                  | Example value                |
|-----------------|----------------------------------------------------------------------------------------------|------------------------------|
| Paircoordinates | Leftmost coordinate of each paired-end read of the template; used as Unique Identifier (UID) | chr21F28219909chr21R28220135 |
| ForRead1        | “Watson” family read counts                                                                  | 19                           |
| ForRead2        | “Crick” family read counts                                                                   | 22                           |
| TotalCount      | Total sum of counts (Watson + Crick)                                                         | 41                           |
| Chrom           | chromosome                                                                                   | chr21                        |
| MoleculeLeft    | hg19 leftmost coordinate of DNA molecule                                                     | 28219909                     |
| MoleculeRight   | hg19 rightmost coordinate of DNA molecule                                                    | 28220234                     |
| #bin            | UCSC Human browser hg19 coordinate bin system                                                | 800                          |

|        |                                                                                                                       |        |
|--------|-----------------------------------------------------------------------------------------------------------------------|--------|
| RepDNA | Unique or Repetitive DNA; values for RepDNA are 'InterruptedRepeat', 'SimpleRepeat', 'SuperDup', 'StructVar', 'RM327' | Unique |
|--------|-----------------------------------------------------------------------------------------------------------------------|--------|

### Final changes output of QUERY 2

| Column header       | Description                                                                                  | Example value              |
|---------------------|----------------------------------------------------------------------------------------------|----------------------------|
| PairCoordinates     | Leftmost coordinate of each paired-end read of the template; used as Unique Identifier (UID) | chr1F20528671chr1R20529090 |
| RepDNA              | Annotated 'Unique' or Repetitive DNA                                                         | RM327                      |
| chrom               | Chromosome                                                                                   | chr1                       |
| Start               | hg19 Start coordinate, 1-start                                                               | 20528702                   |
| end                 | hg19 end coordinate, 1-end                                                                   | 20528702                   |
| BaseFrom            | Reference Base                                                                               | C                          |
| Baseto              | Non-reference Base                                                                           | G                          |
| Cycle               | Cycle number in read                                                                         | 32                         |
| MatchOrientation    | Reference strand orientation                                                                 | F                          |
| InHT                | In Homopolymer with $\geq 8$ ntd                                                             | N                          |
| AverageQualityScore | Average Quality Score of all family duplicates                                               | 41                         |
| MutRead1            | "Watson" family read counts with mutation                                                    | 1                          |
| MutRead2            | "Crick" family read counts with mutation                                                     | 0                          |
| ForRead1s           | Total "Watson" family read counts                                                            | 8                          |
| ForRead2s           | Total "Crick" family read counts                                                             | 4                          |
| TotalMutCount       | Sum total of read counts with mutation (Watson + Crick mutation read counts)                 | 1                          |

## 5 Filter and select high confidence rare mutations and high confidence molecules

The goal of this section is to:

- (1) Use **Final molecules output of QUERY 2** to filter and select for high confidence DNA molecules based on mappability. To do this, we used QUERY 3 for nuclear genome and QUERY 4 for mtDNA.

- (2) Use **Final changes output of QUERY 2** to filter and select for high confidence rare somatic mutations based on quality, clonality, and mappability. To do this, we used QUERY 5 for nuclear genome and QUERY 6 for mtDNA.

### **QUERY 3 (for nuclear molecules)**

```
create table #sm_select (
    pairCoordinates varchar(250), repDNA varchar(25), chrom varchar(50),
    start bigint, [end] bigint, baseFrom varchar(60), baseTo varchar(60), cycle
    tinyint, matchOrientation varchar(1), inHT char(1), averageQualityScore
    tinyint, mutRead1 int, mutRead2 int, forRead1s int, forRead2s int,
    totalMutCount int
)

insert #sm_select
select
    sm.pairCoordinates, sm.repDNA, sm.chrom, sm.start, sm.[end],
    sm.baseFrom, sm.baseTo, sm.cycle, sm.matchOrientation, sm.inHT,
    sm.averageQualityScore, sm.mutRead1, sm.mutRead2, sm.forRead1s, sm.forRead2s,
    sm.totalMutCount

from [MH_Nonclonal_NCS].[dbo].[NgsNCS_SB118NN2NormalP30MM6F5Genome100D063014_1
20714_SuperMutantsSummaryFinal_022213v6] sm
where sm.averageQualityScore >= 20
    and sm.averageQualityScore != 100
    and sm.forRead1s >= 1
    and sm.forRead2s >= 1
    and sm.inHT = 'N'
    and sm.chrom != 'chrM'
    and cast(sm.mutRead1 as float)/cast(sm.forRead1s as float) > 0.5
    and cast(sm.mutRead2 as float)/cast(sm.forRead2s as float) > 0.5

--WGS snp option 1:
and not exists (
    select *
    from [MH_Nonclonal_WGS].[dbo].[LP6005897-DNA_F02.SNPs] wgs1_snp
    where sm.chrom = wgs1_snp.#chrom
        and sm.start = wgs1_snp.pos
)

--WGS snp option 2:
--and not exists (
--select *
--from [MH_Nonclonal_WGS].[dbo].[Brain06_variants] wgs2_snp
--where len(wgs2_snp.ref) = 1
--    and (
--        len(wgs2_snp.alt) = 1
--        or (wgs2_snp.alt like '%,%' and len(wgs2_snp.alt) = 3)
--    )
--    and sm.chrom = wgs2_snp.#chrom
--    and (sm.start = wgs2_snp.pos or sm.[end] = wgs2_snp.pos)
--)

and not exists (
```

```

        select *
        from [LudwigMasterGenes].[dbo].[SNP_SNP130_hg19] snp130
        where sm.[chrom] = snp130.chromosome
            and sm.[start] = snp130.position
            and snp130.posReferenceAllele is not null
            and snp130.posOtherAllele is not null
    )

create table #mutCountPairCoo (
    pairCoordinates varchar(250), mutPerPairCoo int
)
insert #mutCountPairCoo
select paircoordinates, count(*) as mutPerPairCoo
from #sm_select
group by pairCoordinates

create table #uid_select (
    pairCoordinates varchar(120), forRead1 int, forRead2 int, totalCount int,
    chrom varchar(50), moleculeLeft int, moleculeRight int, #bin bigint, repDNA
    varchar(25)
)
insert #uid_select
select pairCoordinates, forRead1, forRead2, totalCount, chrom, moleculeLeft,
moleculeRight, #bin, repDNA
from
[MH_Nonclonal_NCS].[dbo].[NgsNCS_SB118NN2NormalP30MM6F5Genome100D063014_12071
4_SupermutantMoleculesSummaryFinal_022213v6] uids
where uids.chrom != 'chrM'
    and uids.forRead1 >= 2
    and uids.forRead2 >= 2
    and not exists (
        select *
        from
[MH_Nonclonal_NCS].[dbo].[NgsNCS_SB118NN2NormalP30MM6F5Genome100D063014_12071
4_SuperMutantsSummaryFinal_022213v6] hp
        where hp.inHT = 'Y' and
            hp.pairCoordinates = uids.pairCoordinates
    )
    and not exists (
        select *
        from #mutCountPairCoo mc
        where mutPerPairCoo > 1
            and mc.pairCoordinates = uids.PairCoordinates
    )
)

create table #uid_oldrepFilter (
    pairCoordinates varchar(120), forRead1 int, forRead2 int, totalCount
int, chrom varchar(50), moleculeLeft int, moleculeRight int, #bin bigint,
repDNA varchar(25)
)
insert #uid_oldrepFilter
select pairCoordinates, forRead1, forRead2, totalCount, chrom, moleculeLeft,
moleculeRight, #bin, repDNA
from #uid_select uids

where not exists (
    select *

```

```

from [MH_Filtering].[dbo].[hg19__RepDNA_dgvMerged_042814] dgv
where uids.chrom = dgv.chrom
and (
uids.moleculeLeft between dgv.chromStart + 1 and dgv.chromEnd
or
uids.moleculeRight between dgv.chromStart + 1 and dgv.chromEnd
)
)
and not exists (
select *
from [MH_Filtering].[dbo].[hg19__RepDNA_genomicSuperDups_042814] sd
where (
uids.chrom = sd.chrom
and (
uids.moleculeLeft between sd.chromStart + 1 and sd.chromEnd
or
uids.moleculeRight between sd.chromStart + 1 and sd.chromEnd
)
) or (
uids.chrom = sd.otherchrom
and (
uids.moleculeLeft between sd.otherStart + 1 and sd.otherEnd
or
uids.moleculeRight between sd.otherStart + 1 and sd.otherEnd
)
)
)
and not exists (
select *
from [MH_Filtering].[dbo].[hg19__RepDNA_nestedRepeats_042814] nr
where uids.chrom = nr.chrom
and (
uids.moleculeLeft between nr.chromStart + 1 and nr.chromEnd
or
uids.moleculeRight between nr.chromStart + 1 and nr.chromEnd
)
)
)
and not exists (
select *
from [MH_Filtering].[dbo].[hg19__RepDNA_rmsk_042814] rm
where uids.chrom = rm.genoName
and (
uids.moleculeLeft between rm.genoStart + 1 and rm.genoEnd
or
uids.moleculeRight between rm.genoStart + 1 and rm.genoEnd
)
)
)
and not exists (
select *
from [MH_Filtering].[dbo].[hg19__RepDNA_simpleRepeat_042814] sr
where uids.chrom = sr.chrom
and (
uids.moleculeLeft between sr.chromStart + 1 and sr.chromEnd
or
uids.moleculeRight between sr.chromStart + 1 and sr.chromEnd
)
)
)
)

```

```

create table #uid_newrepFilter (
pairCoordinates varchar(120), forRead1 int, forRead2 int, totalCount int,
chrom varchar(50),moleculeLeft int, moleculeRight int, #bin bigint, repDNA
varchar(25)
)
insert #uid_newrepFilter
select pairCoordinates, forRead1, forRead2, totalCount, chrom, moleculeLeft,
moleculeRight,#bin, repDNA
from #uid_oldRepFilter uids
where
    not exists (
        select *
        from [MH_Filtering].[dbo].[031015_goldenPath_hg19_dgvMerged_cltoc14]
dgvM
    where uids.chrom = dgvM.chrom
    and (
        uids.moleculeLeft between dgvM.chromStart + 1 and dgvM.chromEnd
    or
        uids.moleculeRight between dgvM.chromStart + 1 and dgvM.chromEnd
    )
    )
    and not exists (
        select *
        from [MH_Filtering].[dbo].[031015_goldenPath_hg19_dgvSupporting_cltoc14]
dgvS
    where uids.chrom = dgvS.chrom
    and (
        uids.moleculeLeft between dgvS.chromStart + 1 and dgvS.chromEnd
    or
        uids.moleculeRight between dgvS.chromStart + 1 and dgvS.chromEnd
    )
    )
    and not exists (
        select *
        from [MH_Filtering].[dbo].[031015_goldenPath_hg19_genomicSuperDups] sd
    where (
        uids.chrom = sd.chrom
        and uids.moleculeLeft between sd.chromStart + 1 and sd.chromEnd
    ) or (
        uids.chrom = sd.otherChrom
        and uids.moleculeLeft between sd.otherStart + 1 and sd.otherEnd
    ) or (
        uids.chrom = sd.chrom
        and uids.moleculeRight between sd.chromStart + 1 and sd.chromEnd
    ) or (
        uids.chrom = sd.otherChrom
        and uids.moleculeRight between sd.otherStart + 1 and sd.otherEnd
    )
    )
    and not exists (
        select *
        from [MH_Filtering].[dbo].[031015_goldenPath_hg19_nestedRepeats] nr
    where uids.chrom = nr.chrom
    and (
        uids.moleculeLeft between nr.chromStart + 1 and nr.chromEnd
    or
        uids.moleculeRight between nr.chromStart + 1 and nr.chromEnd

```



```

)
)
and not exists (
select *
from [MH_Filtering].[dbo].[031015_goldenPath_hg19_simpleRepeat] sr
where uids.chrom = sr.chrom
and (
uids.moleculeLeft between sr.chromStart - 99 and sr.chromEnd + 100 --
MH UPDATED 5/14/15
or
uids.moleculeRight between sr.chromStart - 99 and sr.chromEnd + 100 --
MH UPDATED 5/14/15
)
)
and not exists (
select *
from [MH_Filtering].[dbo].[031015_goldenPath_hg19_rmsk] rm
where uids.chrom = rm.genoName
and (
uids.moleculeLeft between rm.genoStart + 1 and rm.genoEnd
or
uids.moleculeRight between rm.genoStart + 1 and rm.genoEnd
)
)
and not exists (
select *
from [MH_Filtering].[dbo].[031015_goldenPath_hg19_rmsk] rm_sine
where rm_sine.repClass = 'SINE'
and uids.chrom = rm_sine.genoName
and (
uids.moleculeLeft between rm_sine.genoStart - 99 and rm_sine.genoEnd +
100
or
uids.moleculeRight between rm_sine.genoStart - 99 and rm_sine.genoEnd +
100
)
)
and not exists (
select *
from [MH_Filtering].[dbo].[031015_goldenPath_hg19_rmsk] rm_lc
where rm_lc.repClass = 'low_complexity'
and uids.chrom = rm_lc.genoName
and (
uids.moleculeLeft between rm_lc.genoStart - 99 and rm_lc.genoEnd + 100
or
uids.moleculeRight between rm_lc.genoStart - 99 and rm_lc.genoEnd + 100
)
)
and not exists (
select *
from [MH_Filtering].[dbo].[031015_goldenPath_hg19_rmsk] rm_sr
where rm_sr.repClass = 'simple_repeat'
and uids.chrom = rm_sr.genoName
and (
uids.moleculeLeft between rm_sr.genoStart - 99 and rm_sr.genoEnd + 100
or
uids.moleculeRight between rm_sr.genoStart - 99 and rm_sr.genoEnd + 100
)
)

```

```

    )
  )

select COUNT(*)
from #sm_select
select COUNT(*)
from #mutCountPairCoo
select COUNT(*)
from #uid_select
select COUNT(*)
from #uid_oldRepFilter
select COUNT(*)
from #uid_newRepFilter

drop table #sm_select
drop table #mutCountPairCoo
drop table #uid_select
drop table #uid_oldRepFilter
drop table #uid_newRepFilter

```

#### **QUERY 4 (for mtDNA molecules)**

```

create table #sm_select (
pairCoordinates varchar(250), repDNA varchar(25), chrom varchar(50), start
bigint, [end] bigint, baseFrom varchar(60), baseTo varchar(60), cycle tinyint,
matchOrientation varchar(1), inHT char(1), averageQualityScore tinyint,
mutRead1 int, mutRead2 int, forRead1s int, forRead2s int, totalMutCount int
)
insert #sm_select
select sm.pairCoordinates, sm.repDNA, sm.chrom, sm.start, sm.[end],
sm.baseFrom, sm.baseTo, sm.cycle, sm.matchOrientation, sm.inHT,
sm.averageQualityScore, sm.mutRead1, sm.mutRead2, sm.forRead1s, sm.forRead2s,
sm.totalMutCount
from
[MH_Nonclonal_NCS].[dbo].[NgsNCS_CRC238N1NormalP30MM6F5Genome100D042814_Super
MutantsSummaryFinal_022213v6] sm
where sm.averageQualityScore >= 20
and sm.averageQualityScore != 100
and sm.forRead1s >= 1
and sm.forRead2s >= 1
and sm.inHT = 'N'
and sm.chrom = 'chrM' --for mtDNA
and cast(sm.mutRead1 as float)/cast(sm.forRead1s as float) > 0.5
and cast(sm.mutRead2 as float)/cast(sm.forRead2s as float) > 0.5

--WGS snp option 1:
--and not exists (
--  select *
--  from [MH_Nonclonal_WGS].[dbo].[LP6005897-DNA_H01.SNPs] wgs1_snp
--  where wgs1_snp.#chrom = 'chrM' --for mtDNA
--    and sm.start = wgs1_snp.pos
--)

--WGS snp option 2:
and not exists (

```

```

select *
from [MH_Nonclonal_WGS].[dbo].[CRC238N_variants] wgs2_snp
where wgs2_snp.#chrom = 'chrM' --for mtDNA
      and len(wgs2_snp.ref) = 1
      and (
          len(wgs2_snp.alt) = 1
          or (wgs2_snp.alt like '%,%' and len(wgs2_snp.alt) = 3)
        )
      and (sm.start = wgs2_snp.pos or sm.[end] = wgs2_snp.pos)
)

--and not exists (
--  select *
--  from [LudwigMasterGenes].[dbo].[SNP_SNP130_hg19] snp130
--  where sm.[chrom] = snp130.chromosome
--        and sm.[start] = snp130.position
--        and snp130.posReferenceAllele is not null
--        and snp130.posOtherAllele is not null
--) --dbSNP does not have mitoSNP

create table #mutCountPairCoo (
    pairCoordinates varchar(250), mutPerPairCoo int
)
insert #mutCountPairCoo
select pairCoordinates, count(*) as mutPerPairCoo
from #sm_select
group by pairCoordinates

create table #uid_select (
    pairCoordinates varchar(120), forRead1 int, forRead2 int, totalCount
int, chrom varchar(50), moleculeLeft int, moleculeRight int, #bin bigint,
repDNA varchar(25)
)
insert #uid_select
select pairCoordinates, forRead1, forRead2, totalCount, chrom, moleculeLeft,
moleculeRight, #bin, repDNA
from
[MH_Nonclonal_NCS].[dbo].[NgsNCS_CRC238N1NormalP30MM6F5Genome100D042814_Super
mutantMoleculesSummaryFinal_022213v6] uids
where uids.chrom = 'chrM' --for mtDNA
      and uids.forRead1 >= 2
      and uids.forRead2 >= 2
      and not exists (
          select *
          from
[MH_Nonclonal_NCS].[dbo].[NgsNCS_CRC238N1NormalP30MM6F5Genome100D042814_Super
MutantsSummaryFinal_022213v6] hp
          where hp.inHT = 'Y' and
                hp.pairCoordinates = uids.pairCoordinates
        )
      and not exists (
          select *
          from #mutCountPairCoo mc
          where mutPerPairCoo > 1
          and mc.pairCoordinates = uids.PairCoordinates

```

```

)

--ALL oldRepDNA tables do not include chrM
--create table #uid_oldrepFilter (
--  pairCoordinates varchar(120), forRead1 int, forRead2 int,
--  totalCount int, chrom varchar(50),
--  moleculeLeft int, moleculeRight int, #bin bigint, repDNA varchar(25)
--)
--insert #uid_oldrepFilter
--select
--  pairCoordinates, forRead1, forRead2, totalCount, chrom,
--  moleculeLeft, moleculeRight,
--  #bin, repDNA
--from #uid_select uids
--where not exists (
--  select *
--  from [MH_Filtering].[dbo].[hg19__RepDNA_dgvMerged_042814] dgv
--  where uids.chrom = dgv.chrom
--  and (
--  uids.moleculeLeft between dgv.chromStart + 1 and dgv.chromEnd
--  or
--  uids.moleculeRight between dgv.chromStart + 1 and dgv.chromEnd
--  )
--  )
--  and not exists (
--  select *
--  from [MH_Filtering].[dbo].[hg19__RepDNA_genomicSuperDups_042814] sd
--  where (
--  uids.chrom = sd.chrom
--  and (
--  uids.moleculeLeft between sd.chromStart + 1 and sd.chromEnd
--  or
--  uids.moleculeRight between sd.chromStart + 1 and sd.chromEnd
--  )
--  ) or (
--  uids.chrom = sd.otherchrom
--  and (
--  uids.moleculeLeft between sd.otherStart + 1 and sd.otherEnd
--  or
--  uids.moleculeRight between sd.otherStart + 1 and sd.otherEnd
--  )
--  )
--  )
--  and not exists (
--  select *
--  from [MH_Filtering].[dbo].[hg19__RepDNA_nestedRepeats_042814] nr
--  where uids.chrom = nr.chrom
--  and (
--  uids.moleculeLeft between nr.chromStart + 1 and nr.chromEnd
--  or
--  uids.moleculeRight between nr.chromStart + 1 and nr.chromEnd
--  )
--  )
--  and not exists (
--  select *
--  from [MH_Filtering].[dbo].[hg19__RepDNA_rmsk_042814] rm
--  where uids.chrom = rm.genoName

```

```

--      and (
--      uids.moleculeLeft between rm.genoStart + 1 and rm.genoEnd
--      or
--      uids.moleculeRight between rm.genoStart + 1 and rm.genoEnd
--      )
--      )
--      and not exists (
--      select *
--      from [MH_Filtering].[dbo].[hg19_RepDNA_simpleRepeat_042814] sr
--      where uids.chrom = sr.chrom
--      and (
--      uids.moleculeLeft between sr.chromStart + 1 and sr.chromEnd
--      or
--      uids.moleculeRight between sr.chromStart + 1 and sr.chromEnd
--      )
--      )

--FOUR tRNA sites in RepeatMasker; all others do not have chrM
create table #uid_newrepFilter (
    pairCoordinates varchar(120), forRead1 int, forRead2 int, totalCount
int, chrom varchar(50), moleculeLeft int, moleculeRight int, #bin bigint,
repDNA varchar(25)
)
insert #uid_newrepFilter
select pairCoordinates, forRead1, forRead2, totalCount, chrom, moleculeLeft,
moleculeRight,#bin, repDNA
from #uid_select uids
where
--not exists (
--      select *
--      from
--      [MH_Filtering].[dbo].[031015_goldenPath_hg19_dgvMerged_cltoc14] dgvM
--      where uids.chrom = dgvM.chrom
--      and (
--      uids.moleculeLeft between dgvM.chromStart + 1 and dgvM.chromEnd
--      or
--      uids.moleculeRight between dgvM.chromStart + 1 and dgvM.chromEnd
--      )
--      )
--and not exists (
--      select *
--      from
--      [MH_Filtering].[dbo].[031015_goldenPath_hg19_dgvSupporting_cltoc14] dgvS
--      where uids.chrom = dgvS.chrom
--      and (
--      uids.moleculeLeft between dgvS.chromStart + 1 and dgvS.chromEnd
--      or
--      uids.moleculeRight between dgvS.chromStart + 1 and dgvS.chromEnd
--      )
--      )
--and not exists (
--      select *
--      from [MH_Filtering].[dbo].[031015_goldenPath_hg19_genomicSuperDups] sd
--      where (      uids.chrom = sd.chrom
--      and      uids.moleculeLeft between sd.chromStart + 1 and sd.chromEnd
--      ) or (
--      uids.chrom = sd.otherChrom

```

```

-- and uids.moleculeLeft between sd.otherStart + 1 and sd.otherEnd
-- ) or (
-- uids.chrom = sd.chrom
-- and uids.moleculeRight between sd.chromStart + 1 and sd.chromEnd
-- ) or (
-- uids.chrom = sd.otherChrom
-- and uids.moleculeRight between sd.otherStart + 1 and sd.otherEnd
-- )
--)
--and not exists (
-- select *
-- from [MH_Filtering].[dbo].[031015_goldenPath_hg19_nestedRepeats] nr
-- where uids.chrom = nr.chrom
-- and (
-- uids.moleculeLeft between nr.chromStart + 1 and nr.chromEnd
-- or
-- uids.moleculeRight between nr.chromStart + 1 and nr.chromEnd
-- )
--)
--and not exists (
-- select *
-- from [MH_Filtering].[dbo].[031015_goldenPath_hg19_simpleRepeat] sr
-- where uids.chrom = sr.chrom
-- and (
-- uids.moleculeLeft between sr.chromStart + 1 and sr.chromEnd
-- or
-- uids.moleculeRight between sr.chromStart + 1 and sr.chromEnd
-- )
--)
not exists (
select *
from [MH_Filtering].[dbo].[031015_goldenPath_hg19_rmsk] rm
where rm.genoName = 'chrM'
and (
uids.moleculeLeft between rm.genoStart + 1 and rm.genoEnd
or
uids.moleculeRight between rm.genoStart + 1 and rm.genoEnd
)
)
--and not exists (
-- select *
-- from [MH_Filtering].[dbo].[031015_goldenPath_hg19_rmsk] rm_sine
-- where rm_sine.repClass = 'SINE'
-- and uids.chrom = rm_sine.genoName
-- and (
-- uids.moleculeLeft between rm_sine.genoStart - 99 and
-- rm_sine.genoEnd + 100
-- or
-- uids.moleculeRight between rm_sine.genoStart - 99
-- and rm_sine.genoEnd + 100
-- )
--)
--and not exists (
-- select *
-- from [MH_Filtering].[dbo].[031015_goldenPath_hg19_rmsk] rm_lc
-- where rm_lc.repClass = 'low_complexity'
-- and uids.chrom = rm_lc.genoName

```

```

--      and (
--      uids.moleculeLeft between rm_lc.genoStart - 99 and rm_lc.genoEnd + 100
--      or
--      uids.moleculeRight between rm_lc.genoStart - 99 and rm_lc.genoEnd + 100
--      )
--)
--and not exists (
--      select *
--      from [MH_Filtering].[dbo].[031015_goldenPath_hg19_rmsk] rm_sr
--      where rm_sr.repClass = 'simple_repeat'
--      and uids.chrom = rm_sr.genoName
--      and (
--      uids.moleculeLeft between rm_sr.genoStart - 99 and rm_sr.genoEnd + 100
--      or
--      uids.moleculeRight between rm_sr.genoStart - 99 and rm_sr.genoEnd + 100
--)
--)

select COUNT(*)
from #sm_select
select COUNT(*)
from #mutCountPairCoo
select COUNT(*)
from #uid_select
--select COUNT(*)
--from #uid_oldRepFilter
select COUNT(*)
from #uid_newRepFilter

drop table #sm_select
drop table #mutCountPairCoo
drop table #uid_select
--drop table #uid_oldRepFilter
drop table #uid_newRepFilter

```

## **QUERY 5 (nuclear mutations)**

```

create table #sm_select (pairCoordinates varchar(250), repDNA varchar(25),
chrom varchar(50), start bigint, [end] bigint, baseFrom varchar(60), baseTo
varchar(60), cycle tinyint, matchOrientation varchar(1), inHT char(1),
averageQualityScore tinyint, mutRead1 int, mutRead2 int, forRead1s int,
forRead2s int, totalMutCount int
)
insert #sm_select
select sm.pairCoordinates, sm.repDNA, sm.chrom, sm.start, sm.[end],
sm.baseFrom, sm.baseTo, sm.cycle, sm.matchOrientation, sm.inHT,
sm.averageQualityScore, sm.mutRead1, sm.mutRead2, sm.forRead1s, sm.forRead2s,
sm.totalMutCount
from
[MH_Nonclonal_NCS].[dbo].[NgsNCS_BarIn07NormalP30MM6F5Genome100D031615_SuperM
utantsSummaryFinal_022213v6] sm
where sm.averageQualityScore >= 20
      and sm.averageQualityScore != 100
      and sm.forRead1s >= 1
      and sm.forRead2s >= 1

```

```

and sm.inHT = 'N'
and sm.chrom != 'chrM'
and cast(sm.mutRead1 as float)/cast(sm.forRead1s as float) > 0.5
and cast(sm.mutRead2 as float)/cast(sm.forRead2s as float) > 0.5

--WGS snp option 1:
--and not exists (
--  select *
--  from [MH_Nonclonal_WGS].[dbo].[LP6005897-DNA_H01.SNPs] wgs1_snp
--  where sm.chrom = wgs1_snp.#chrom
--        and sm.start = wgs1_snp.pos
--)
--WGS snp option 2:
and not exists (
select *
from [MH_Nonclonal_WGS].[dbo].[Brain07_variants] wgs2_snp
where len(wgs2_snp.ref) = 1
and (
len(wgs2_snp.alt) = 1
or (wgs2_snp.alt like '%,%' and len(wgs2_snp.alt) = 3)
)
and sm.chrom = wgs2_snp.#chrom
and (sm.start = wgs2_snp.pos or sm.[end] = wgs2_snp.pos)
)

and not exists (
select *
from [LudwigMasterGenes].[dbo].[SNP_SNP130_hg19] snp130
where sm.[chrom] = snp130.chromosome
and sm.[start] = snp130.position
and snp130.posReferenceAllele is not null
and snp130.posOtherAllele is not null
)

create table #mutCountPairCoo (
  pairCoordinates varchar(250), mutPerPairCoo int
)
insert #mutCountPairCoo
select paircoordinates, count(*) as mutPerPairCoo
from #sm_select
group by pairCoordinates

create table #sm_select_filtered (
  pairCoordinates varchar(250), repDNA varchar(25), chrom varchar(50),
  start bigint, [end] bigint, baseFrom varchar(60), baseTo varchar(60), cycle
  tinyint, matchOrientation varchar(1), inHT char(1), averageQualityScore
  tinyint, mutRead1 int, mutRead2 int, forRead1s int, forRead2s int,
  totalMutCount int, mutPerPairCoo int
)
insert #sm_select_filtered
select
sm.pairCoordinates, sm.repDNA, sm.chrom, sm.start, sm.[end], sm.baseFrom,
sm.baseTo, sm.cycle, sm.matchOrientation, sm.inHT,
sm.averageQualityScore, sm.mutRead1, sm.mutRead2, sm.forRead1s, sm.forRead2s,
sm.totalMutCount, mc.MutPerPairCoo

```



```

from #sm_select sm left outer join #mutCountPairCoo mc
on sm.pairCoordinates = mc.pairCoordinates
where sm.averageQualityScore >= 30
    and cast(sm.mutRead1 as float)/cast(sm.forRead1s as float) >= 0.9
    and cast(sm.mutRead2 as float)/cast(sm.forRead2s as float) >= 0.9
    and sm.cycle != 6
    and sm.cycle != 7
    and mc.mutPerPairCoo = 1
    and not exists (
        select *
        from [MH_Filtering].[dbo].[hg19__RepDNA_dgvMerged_042814] dgv
        where sm.chrom = dgv.chrom
    and sm.start between dgv.chromStart + 1 and dgv.chromEnd
    )
    and not exists (
    select *
    from [MH_Filtering].[dbo].[hg19__RepDNA_genomicSuperDups_042814] sd
    where (
    sm.chrom = sd.chrom
    and sm.start between sd.chromStart + 1 and sd.chromEnd
    ) or (
    sm.chrom = sd.otherchrom
    and sm.start between sd.otherStart + 1 and sd.otherEnd
    )
    )
    and not exists (
        select *
        from [MH_Filtering].[dbo].[hg19__RepDNA_nestedRepeats_042814] nr
        where sm.chrom = nr.chrom
            and sm.start between nr.chromStart + 1 and nr.chromEnd
    )
    and not exists (
        select *
        from [MH_Filtering].[dbo].[hg19__RepDNA_rmsk_042814] rm
        where sm.chrom = rm.genoName
            and sm.start between rm.genoStart + 1 and rm.genoEnd
    )
    and not exists (
        select *
        from [MH_Filtering].[dbo].[hg19__RepDNA_simpleRepeat_042814] sr
        where sm.chrom = sr.chrom
            and sm.start between sr.chromStart + 1 and sr.chromEnd
    )

select count(*)
from #sm_select
select count(*)
from #mutCountPairCoo
select count(*)
from #sm_select_filtered

select *
from #sm_select_filtered sm
where forRead1s >= 2 and forRead2s >= 2

```

```

--WGS indel option 1:
--and not exists (
--  select *
--  from [MH_Nonclonal_WGS].[dbo].[LP6005897-DNA_H01.Indels] wgs1_indel
--  where sm.chrom = wgs1_indel.#chrom
--  and ( sm.start between wgs1_indel.pos + 1 and wgs1_indel.pos + len(ref)
--  or
--  sm.[end] between wgs1_indel.pos + 1 and wgs1_indel.pos + len(ref)
--  )
--)
--WGS indel option 2:
and not exists (
  select *
  from [MH_Nonclonal_WGS].[dbo].[Brain07_variants] wgs2_indel
  where ( len(wgs2_indel.ref) > 1
  or
  ( len(wgs2_indel.ref) = 1
  and len(wgs2_indel.ref) != len(wgs2_indel.alt)
  and wgs2_indel.alt not like 'A,%'
  and wgs2_indel.alt not like 'T,%'
  and wgs2_indel.alt not like 'C,%'
  and wgs2_indel.alt not like 'G,%'
  )
  )
  and sm.chrom = wgs2_indel.#chrom
  and (
  sm.start between wgs2_indel.pos + 1 and wgs2_indel.pos + len(ref)
  or sm.[end] between wgs2_indel.pos + 1 and wgs2_indel.pos + len(ref)
  )
  )

and not exists (
  select *
  from [MH_filtering].[dbo].[031015_goldenPath_hg19_snp142_snps] snp142
  where sm.chrom = snp142.chrom
  and sm.start = snp142.posEnd
  )
and not exists (
  select *
  from [MH_filtering].[dbo].[031015_goldenPath_hg19_snp142_other]
  other142
  where sm.chrom = other142.chrom
  and sm.Start between other142.posStart and other142.posEnd
  )
and not exists (
  select *
  from [MH_Filtering].[dbo].[031015_goldenPath_hg19_dgvMerged_c1toc14]
  dgvM
  where sm.chrom = dgvM.chrom
  and sm.start between dgvM.chromStart + 1 and dgvM.chromEnd
  )
and not exists (
  select *
  from [MH_Filtering].[dbo].[031015_goldenPath_hg19_dgvSupporting_c1toc14]
  dgvS
  where sm.chrom = dgvS.chrom
  and sm.start between dgvS.chromStart + 1 and dgvS.chromEnd

```

```

)
and not exists (
select *
from [MH_Filtering].[dbo].[031015_goldenPath_hg19_genomicSuperDups] sd
where (
sm.chrom = sd.chrom
and sm.start between sd.chromStart + 1 and sd.chromEnd
) or (
sm.chrom = sd.otherchrom
and sm.start between sd.otherStart + 1 and sd.otherEnd
)
)
and not exists (
select *
from [MH_Filtering].[dbo].[031015_goldenPath_hg19_nestedRepeats] nr
where sm.chrom = nr.chrom
and sm.start between nr.chromStart + 1 and nr.chromEnd
)
and not exists (
select *
from [MH_Filtering].[dbo].[031015_goldenPath_hg19_simpleRepeat] sr
where sm.chrom = sr.chrom
and sm.start between sr.chromStart - 99 and sr.chromEnd + 100
)
and not exists (
select *
from [MH_Filtering].[dbo].[031015_goldenPath_hg19_rmsk] rm
where sm.chrom = rm.genoName
and sm.start between rm.genoStart + 1 and rm.genoEnd
)
and not exists (
select *
from [MH_Filtering].[dbo].[031015_goldenPath_hg19_rmsk] rm_sine
where rm_sine.repClass = 'SINE'
and sm.chrom = rm_sine.genoName
and sm.start between rm_sine.genoStart - 99 and rm_sine.genoEnd + 100
)
and not exists (
select *
from [MH_Filtering].[dbo].[031015_goldenPath_hg19_rmsk] rm_lc
where rm_lc.repClass = 'low_complexity'
and sm.chrom = rm_lc.genoName
and sm.start between rm_lc.genoStart - 99 and rm_lc.genoEnd + 100
)
and not exists (
select *
from [MH_Filtering].[dbo].[031015_goldenPath_hg19_rmsk] rm_sr
where rm_sr.repClass = 'simple_repeat'
and sm.chrom = rm_sr.genoName
and sm.start between rm_sr.genoStart - 99 and rm_sr.genoEnd + 100
)
order by chrom, start

drop table #sm_select
drop table #mutCountPairCoo
drop table #sm_select_filtered

```

## QUERY 6 (mtDNA mutations)

```
create table #sm_select (
pairCoordinates varchar(250), repDNA varchar(25), chrom varchar(50), start
bigint, [end] bigint, baseFrom varchar(60), baseTo varchar(60), cycle tinyint,
matchOrientation varchar(1), inHT char(1), averageQualityScore tinyint,
mutRead1 int, mutRead2 int, forRead1s int, forRead2s int, totalMutCount int
)
insert #sm_select
select
sm.pairCoordinates, sm.repDNA, sm.chrom, sm.start, sm.[end], sm.baseFrom,
sm.baseTo, sm.cycle, sm.matchOrientation, sm.inHT,
sm.averageQualityScore, sm.mutRead1, sm.mutRead2, sm.forRead1s, sm.forRead2s,
sm.totalMutCount
from
[MH_Nonclonal_NCS].[dbo].NgsNCS_CRC238N1NormalP30MM6F5Genome100D042814_SuperM
utantsSummaryFinal_022213v6 sm
where sm.averageQualityScore >= 20
and sm.averageQualityScore != 100
and sm.forRead1s >= 1
and sm.forRead2s >= 1
and sm.inHT = 'N'
and sm.chrom = 'chrM' --for mtDNA
and cast(sm.mutRead1 as float)/cast(sm.forRead1s as float) > 0.5
and cast(sm.mutRead2 as float)/cast(sm.forRead2s as float) > 0.5

--WGS snp option 1:
--and not exists (
-- select *
-- from [MH_Nonclonal_WGS].[dbo].[LP6005897-DNA_B03.SNPs] wgs1_snp
-- where wgs1_snp.#chrom = 'chrM'
-- and sm.start = wgs1_snp.pos
--)

--WGS snp option 2:
and not exists (
select *
from [MH_Nonclonal_WGS].[dbo].[CRC238N_variants] wgs2_snp
where wgs2_snp.#chrom = 'chrM' --for chrM
and len(wgs2_snp.ref) = 1
and (
len(wgs2_snp.alt) = 1
or (wgs2_snp.alt like '%,%' and len(wgs2_snp.alt) = 3)
)
and (sm.start = wgs2_snp.pos or sm.[end] = wgs2_snp.pos)
)
--and not exists (
-- select *
-- from [LudwigMasterGenes].[dbo].[SNP_SNP130_hg19] snp130
-- where sm.[chrom] = snp130.chromosome
-- and sm.[start] = snp130.position
-- and snp130.posReferenceAllele is not null
-- and snp130.posOtherAllele is not null
--)
```

```

create table #mutCountPairCoo (
    pairCoordinates varchar(250), mutPerPairCoo int
)
insert #mutCountPairCoo
select paircoordinates, count(*) as mutPerPairCoo
from #sm_select
group by pairCoordinates

create table #sm_select_filtered (
pairCoordinates varchar(250), repDNA varchar(25), chrom varchar(50), start
bigint, [end] bigint, baseFrom varchar(60), baseTo varchar(60), cycle tinyint,
matchOrientation varchar(1), inHT char(1), averageQualityScore tinyint,
mutRead1 int, mutRead2 int, forRead1s int, forRead2s int, totalMutCount int,
mutPerPairCoo int
)
insert #sm_select_filtered
select
sm.pairCoordinates, sm.repDNA, sm.chrom, sm.start, sm.[end], sm.baseFrom,
sm.baseTo, sm.cycle, sm.matchOrientation, sm.inHT,
sm.averageQualityScore, sm.mutRead1, sm.mutRead2, sm.forRead1s, sm.forRead2s,
sm.totalMutCount, mc.MutPerPairCoo
from #sm_select sm left outer join #mutCountPairCoo mc
on sm.pairCoordinates = mc.pairCoordinates
where sm.averageQualityScore >= 30
    and cast(sm.mutRead1 as float)/cast(sm.forRead1s as float) >= 0.9
    and cast(sm.mutRead2 as float)/cast(sm.forRead2s as float) >= 0.9
    and sm.cycle != 6
    and sm.cycle != 7
    and mc.mutPerPairCoo = 1
--and not exists (
--    select *
--    from [MH_Filtering].[dbo].[hg19__RepDNA_dgvMerged_042814] dgv
--    where sm.chrom = dgv.chrom
--           and sm.start between dgv.chromStart + 1 and dgv.chromEnd
--)
--and not exists (
--    select *
--    from [MH_Filtering].[dbo].[hg19__RepDNA_genomicSuperDups_042814] sd
--    where (
--        sm.chrom = sd.chrom
--        and sm.start between sd.chromStart + 1 and sd.chromEnd
--    ) or (
--        sm.chrom = sd.otherchrom
--        and sm.start between sd.otherStart + 1 and sd.otherEnd
--    )
--)
--and not exists (
--    select *
--    from [MH_Filtering].[dbo].[hg19__RepDNA_nestedRepeats_042814] nr
--    where sm.chrom = nr.chrom
--           and sm.start between nr.chromStart + 1 and nr.chromEnd
--)
--    and not exists (
--    select *

```

```

--      from [MH_Filtering].[dbo].[hg19_RepDNA_rmsk_042814] rm
--      where sm.chrom = rm.genoName
--            and sm.start between rm.genoStart + 1 and rm.genoEnd
--)
--      and not exists (
--      select *
--      from [MH_Filtering].[dbo].[hg19_RepDNA_simpleRepeat_042814] sr
--      where sm.chrom = sr.chrom
--            and sm.start between sr.chromStart + 1 and sr.chromEnd
--)

select count(*)
from #sm_select
select count(*)
from #mutCountPairCoo
select count(*)
from #sm_select_filtered

select *
from #sm_select_filtered sm
where forRead1s >= 2 and forRead2s >= 2

--WGS indel option 1:
--and not exists (
--      select *
--      from [MH_Nonclonal_WGS].[dbo].[LP6005897-DNA_B03.Indels] wgs1_indel
--      where wgs1_indel.#chrom = 'chrM' --for mtDNA
--            and ( sm.start between wgs1_indel.pos + 1 and wgs1_indel.pos + len(ref)
--                  or      sm.[end] between wgs1_indel.pos + 1 and wgs1_indel.pos + len(ref)
--                  )
--)

--WGS indel option 2:
and not exists (
  select *
  from [MH_Nonclonal_WGS].[dbo].[CRC238N_variants] wgs2_indel
  where wgs2_indel.#chrom = 'chrM' --for mtDNA
  and ( len(wgs2_indel.ref) > 1
  or
  (
    len(wgs2_indel.ref) = 1
    and len(wgs2_indel.ref) != len(wgs2_indel.alt)
    and wgs2_indel.alt not like 'A,%'
    and wgs2_indel.alt not like 'T,%'
    and wgs2_indel.alt not like 'C,%'
    and wgs2_indel.alt not like 'G,%'
  )
)
and (
  sm.start between wgs2_indel.pos + 1 and wgs2_indel.pos + len(ref)
  or      sm.[end] between wgs2_indel.pos + 1 and wgs2_indel.pos + len(ref)
)
)

and not exists (
  select *

```

```

from [MH_filtering].[dbo].[031015_goldenPath_hg19_snp142_snps] snp142
where snp142.chrom = 'chrM' --for mtDNA
      and sm.start = snp142.posEnd
)
and not exists (
select *
from
[MH_filtering].[dbo].[031015_goldenPath_hg19_snp142_other] other142
where other142.chrom = 'chrM' --for mtDNA
      and sm.Start between other142.posStart and other142.posEnd
)
--and not exists (
--  select *
--  from [MH_Filtering].[dbo].[031015_goldenPath_hg19_dgvMerged_cltoc14]
dgvM
--  where sm.chrom = dgvM.chrom
--        and sm.start between dgvM.chromStart + 1 and dgvM.chromEnd
--)
--and not exists (
--  select *
--  from
--  [MH_Filtering].[dbo].[031015_goldenPath_hg19_dgvSupporting_cltoc14]dgvS
--  where sm.chrom = dgvS.chrom
--        and sm.start between dgvS.chromStart + 1 and dgvS.chromEnd
--)
--and not exists (
--  select *
--  from [MH_Filtering].[dbo].[031015_goldenPath_hg19_genomicSuperDups] sd
--  where (
--        sm.chrom = sd.chrom
--        and sm.start between sd.chromStart + 1 and sd.chromEnd
--      ) or (
--        sm.chrom = sd.otherchrom
--        and sm.start between sd.otherStart + 1 and sd.otherEnd
--      )
--)
--and not exists (
--  select *
--  from [MH_Filtering].[dbo].[031015_goldenPath_hg19_nestedRepeats] nr
--  where sm.chrom = nr.chrom
--        and sm.start between nr.chromStart + 1 and nr.chromEnd
--)
--and not exists (
--  select *
--  from [MH_Filtering].[dbo].[031015_goldenPath_hg19_simpleRepeat] sr
--  where sm.chrom = sr.chrom
--        and sm.start between sr.chromStart - 99 and sr.chromEnd + 100
--)
and not exists (
select *
from [MH_Filtering].[dbo].[031015_goldenPath_hg19_rmsk] rm
where      rm.genoName = 'chrM'
          and sm.start between rm.genoStart + 1 and rm.genoEnd
)
--and not exists (
--  select *
--  from [MH_Filtering].[dbo].[031015_goldenPath_hg19_rmsk] rm_sine

```

```

--     where rm_sine.repClass = 'SINE'
--     and sm.chrom = rm_sine.genoName
--     and sm.start between rm_sine.genoStart - 99 and rm_sine.genoEnd + 100
--)
--and not exists (
--  select *
--  from [MH_Filtering].[dbo].[031015_goldenPath_hg19_rmsk] rm_lc
--  where rm_lc.repClass = 'low_complexity'
--        and sm.chrom = rm_lc.genoName
--        and sm.start between rm_lc.genoStart - 99 and rm_lc.genoEnd + 100
--)
--and not exists (
--  select *
--  from [MH_Filtering].[dbo].[031015_goldenPath_hg19_rmsk] rm_sr
--  where rm_sr.repClass = 'simple_repeat'
--        and sm.chrom = rm_sr.genoName
--        and sm.start between rm_sr.genoStart - 99 and rm_sr.genoEnd + 100
--)
order by chrom, start

drop table #sm_select
drop table #mutCountPairCoo
drop table #sm_select_filtered

```

## 6 Validation of mutation calls

From QUERY 5 and QUERY 6, we get a candidate mutation list for nuclear DNA and mtDNA, respectively.

For nuclear DNA mutations candidates:

1. All candidate calls were visually inspected in a mutation viewer to verify call.
2. Subset of candidate mutations were Sanger sequenced from the original gDNA sample to verify that they were not present at clonal frequencies (e.g. germline).

For mtDNA mutation candidates:

1. All candidate calls were visually inspected in a mutation viewer to verify call.
2. Any candidate observed in the mutation viewer to be present in more than one UID family was eliminated.

## 7 Addendum to QUERY 1

Integrated into QUERY 1 is the following homopolymer code written in C#. This code identifies mutations that occur within homopolymers that are 8 or more nucleotides in length.



```

using System;
using System.Data;
using System.Data.SqlClient;
using System.Data.SqlTypes;
using Microsoft.SqlServer.Server;
using System.Text.RegularExpressions;
using System.Collections.Generic;

public static partial class UserDefinedFunctions
{
    [SqlFunction(IsDeterministic = true, IsPrecise = true)]
    public static string HomopolymerTractPosforSBS(string matchString, int
lowlim_search, int maxgap, int lowlim_total)
    {
        /* Define search patterns for homopolymers */
        string ht_pos_pat = "[A]" + lowlim_search + ",})|" +
                            "[C]" + lowlim_search + ",})|" +
                            "[T]" + lowlim_search + ",})|" +
                            "[G]" + lowlim_search + ",})";
        Regex ht_pos = new Regex(ht_pos_pat, RegexOptions.IgnoreCase |
RegexOptions.Compiled);

        /* Search for homopolymers */
        MatchCollection ht_pos_matches = ht_pos.Matches(matchString);
        int[, ] ht_pos_key = new int[ht_pos_matches.Count, 3];
        int ht_pos_key_cursor = 0;
        int nuc_num;
        foreach (Match hpMatch in ht_pos_matches)
        {
            if (hpMatch.ToString().Substring(0, 1) == "A")
            {
                nuc_num = 1;
            }
            else if (hpMatch.ToString().Substring(0, 1) == "C")
            {
                nuc_num = 2;
            }
            else if (hpMatch.ToString().Substring(0, 1) == "T")
            {
                nuc_num = 3;
            }
            else if (hpMatch.ToString().Substring(0, 1) == "G")
            {
                nuc_num = 4;
            }
            else
            {
                nuc_num = 0;
            }

            ht_pos_key[ht_pos_key_cursor, 0] = nuc_num;
            ht_pos_key[ht_pos_key_cursor, 1] = hpMatch.Index;
            ht_pos_key[ht_pos_key_cursor, 2] = hpMatch.Length;
        }
    }
}

```

```

        if (ht_pos_key_cursor > 0 && ht_pos_key_cursor <
ht_pos_matches.Count - 1) /*not first and not last?*/
        {
            if (ht_pos_key[ht_pos_key_cursor - 1, 2] < lowlim_total &&
ht_pos_key[ht_pos_key_cursor - 1, 0] != nuc_num)
            {
                ht_pos_key[ht_pos_key_cursor - 1, 2] = 0;
            }
            else if (ht_pos_key[ht_pos_key_cursor - 1, 0] == nuc_num)
            {
                if (hpMatch.Index - (ht_pos_key[ht_pos_key_cursor - 1,
1] + ht_pos_key[ht_pos_key_cursor - 1, 2]) <= maxgap)
                { /* "merge" the items */
                    ht_pos_key[ht_pos_key_cursor - 1, 2] = 0;
                    ht_pos_key[ht_pos_key_cursor, 1] =
ht_pos_key[ht_pos_key_cursor - 1, 1];
                    ht_pos_key[ht_pos_key_cursor, 2] = (hpMatch.Index
- ht_pos_key[ht_pos_key_cursor - 1, 1]) + hpMatch.Length;
                }
                else if (ht_pos_key[ht_pos_key_cursor - 1, 2] >=
lowlim_total)
                {
                    ht_pos_key_cursor++;
                    continue;
                }
                else
                {
                    ht_pos_key[ht_pos_key_cursor - 1, 2] = 0;
                }
            }
        }
        else if (ht_pos_matches.Count == 1 && ht_pos_key_cursor == 0)
/*first and only?*/
        {
            if (hpMatch.Length < lowlim_total)
            {
                ht_pos_key[ht_pos_key_cursor, 2] = 0;
            }
        }
        else if (ht_pos_key_cursor > 0 && ht_pos_key_cursor ==
ht_pos_matches.Count - 1)
        {
            if (ht_pos_key[ht_pos_key_cursor - 1, 2] < lowlim_total &&
ht_pos_key[ht_pos_key_cursor - 1, 0] != nuc_num)
            {
                ht_pos_key[ht_pos_key_cursor - 1, 2] = 0;
            }
            else if (ht_pos_key[ht_pos_key_cursor - 1, 0] == nuc_num)
            {
                if (hpMatch.Index - (ht_pos_key[ht_pos_key_cursor - 1,
1] + ht_pos_key[ht_pos_key_cursor - 1, 2]) <= maxgap)
                { /* "merge" the items */
                    ht_pos_key[ht_pos_key_cursor - 1, 2] = 0;
                }
            }
        }
    }
}

```

```

        ht_pos_key[ht_pos_key_cursor, 1] =
ht_pos_key[ht_pos_key_cursor - 1, 1];
        ht_pos_key[ht_pos_key_cursor, 2] = (hpMatch.Index
- ht_pos_key[ht_pos_key_cursor - 1, 1]) + hpMatch.Length;
        if (ht_pos_key[ht_pos_key_cursor, 2] <
lowlim_total) /*new block unique for last item only*/
        {
            ht_pos_key[ht_pos_key_cursor, 2] = 0;
        }
    }
    else if (ht_pos_key[ht_pos_key_cursor - 1, 2] >=
lowlim_total)
    {
        ht_pos_key_cursor++;
        continue;
    }
    else
    {
        ht_pos_key[ht_pos_key_cursor - 1, 2] = 0;
    }
}
ht_pos_key_cursor++;
}

/* Build output string */
string ht_pos_out = new string(' ', matchString.Length);
int j;
for (j = 0; j < ht_pos_matches.Count; j++)
{
    if (ht_pos_key[j, 2] >= lowlim_total)
    {
        ht_pos_out = ht_pos_out.Insert(ht_pos_key[j, 1], new
string(' ', ht_pos_key[j, 2]).Replace(" ", "X"));
        ht_pos_out = ht_pos_out.Remove(matchString.Length);
    }
}

return ht_pos_out;
}
}

```
